# Supplementary material for: Phosphenic isocyanate (O2PNCO): gas-phase generation, characterization, and photodecomposition reactions
Source: Royal Society of Chemistry journal article supplement (doi:10.1039/d2cc03178g), 2022-01-01
Supplement: d2cc03178g1.pdf [file d2cc03178g1.pdf]

## Supporting information

### Phosphenic isocyanate ( $O_2PNCO$ ): Gas-phase generation, characterization, and photodecomposition reactions

Bifeng Zhu,<sup>a</sup> Junjie Jiang,<sup>a</sup> Bo Lu,<sup>a</sup> Xiaolong Li,<sup>a</sup> Xin Jiang,<sup>a</sup> Guntram Rauhut,<sup>b</sup> and Xiaoqing Zeng<sup>a\*</sup>

<sup>a</sup> Department of Chemistry, Shanghai Key Laboratory of Molecular Catalysts and Innovative Materials, Fudan University, Shanghai 200433 (China)

E-mails: xqzeng@fudan.edu.cn

<sup>b</sup> Institute for Theoretical Chemistry, University of Stuttgart, Stuttgart 70569 (Germany)

### Table of Contents

|                                                                                                                    |     |
|--------------------------------------------------------------------------------------------------------------------|-----|
| Experimental and computational details.....                                                                        | S2  |
| Matrix-isolation IR spectra (Figures S1-S7) .....                                                                  | S4  |
| Matrix-isolation UV-vis spectra (Figure S8) .....                                                                  | S11 |
| Calculated IRC result for TS1 (Figure S9) .....                                                                    | S12 |
| Calculated potential energy profile for $O_2NNCO$ (Figure S10) .....                                               | S13 |
| Calculated IRC result for TS2 (Figure S11) .....                                                                   | S14 |
| Calculated UV-vis spectra for $C_2H_4O_2PN$ , $O_2PNCO$ , $O_2PN$ , and $OPNO$ (Figures S12-S15) .....             | S15 |
| Calculated IR data for $O_2PNCO$ (Table S1) .....                                                                  | S19 |
| Calculated IR data for $O_2PN$ and $OPNO$ (Table S2) .....                                                         | S20 |
| Calculated and observed IR data for $C_2H_4O_2PN$ (Table S3) .....                                                 | S21 |
| Calculated vertical excitation energies for $O_2PNCO$ and $O_2PN$ (Table S4) .....                                 | S22 |
| Calculated vertical excitation energies for $OPNO$ (Table S5) .....                                                | S23 |
| Calculated vertical excitation energies for $C_2H_4O_2PNCO$ , $C_2H_4O_2PN_3$ , and $C_2H_4O_2PN$ (Table S6) ..... | S24 |
| Calculated IR data for $O_2PNCO$ isomers (Table S7) .....                                                          | S25 |
| Calculated IR data for $O_2PN$ isomers (Table S8) .....                                                            | S26 |
| Calculated relative energies for $OPNO$ (Table S9) .....                                                           | S27 |
| Calculated vertical excitation energies for $HNCO$ and isomers (Table S10) .....                                   | S27 |
| References.....                                                                                                    | S28 |
| Calculated atomic coordinates and energies for all optimized structures.....                                       | S29 |

## Experimental and computational details

### Sample preparation

**Caution! Covalent azides are highly energetic and may decompose explosively. Especially,  $C_2H_4O_2PN_3$  undergoes fast hydrolysis when exposing to moisture by forming highly toxic and explosive hydrazoic acid ( $HN_3$ ). Although no explosion was encountered with purified  $C_2H_4O_2PN_3$  during this work, it should be handled with great care in small quantities (< 5 mmol) and appropriate safety precautions (face shields, leather gloves, and protective clothes) should be taken. Ignoring safety precautions may lead to serious injuries!**

2-Isocyanato-1,3,2-dioxaphospholane,  $C_2H_4O_2PNCO$ , was synthesized by reaction of  $C_2H_4O_2PCI$  (97%, Sigma-Aldrich) with  $AgNCO$  (98 %, Alfa Aesar). Briefly, commercial 2-chloro-1,3,2-dioxaphospholane (1 mmol, 0.09 mL) and dry silver isocyanate (1.5 mmol, 0.225 g) were added into a reaction vessel containing acetonitrile (1 mL) under inert atmosphere. The mixture was stirred 48 h at room temperature. The volatile products were separated by passing through three successive cold U-traps ( $-10$ ,  $-35$ , and  $-196$  °C). Pure  $C_2H_4O_2PNCO$  was retained in the second trap, and its hydrolysis product  $HNCO$  was trapped in the last trap. The purity of the substance was checked with gas phase IR (INSA OPTICS FOLI10-R,  $\nu = 2260, 1403, 1014, 926, 810, 756, \text{ and } 690 \text{ cm}^{-1}$ ) and NMR spectroscopy (Bruker Avance III HD 500 spectrometer,  $^{31}P$  NMR (162 MHz,  $CD_3CN$ ):  $\delta = -122.9$  ppm). By analogy, 2-azido-1,3,2-dioxaphospholane,  $C_2H_4O_2PN_3$ , was synthesized by the reaction of  $C_2H_4O_2PCI$  (97%, Sigma-Aldrich, 1 mmol) with  $Me_3SiN_3$  (95%, Aladdin, 6 mmol) in THF (2 mL). And its quality was checked with gas-phase IR spectroscopy ( $\nu = 2130, 1262, 1014, 925, 852, 809, 757, \text{ and } 720 \text{ cm}^{-1}$ ).

Gases Ar ( $\geq 99.999\%$ , Linde), and  $N_2$  ( $\geq 99.999\%$ , Linde) were used without further purification.

### Matrix-isolation IR spectroscopy

Matrix IR spectra were recorded on an FT-IR spectrometer (Bruker 70V) in a reflectance mode using a transfer optic. A KBr beam splitter and MCT detector were used in the mid-IR region ( $5000\text{--}400 \text{ cm}^{-1}$ ). Typically, 200 scans at a resolution of  $0.5 \text{ cm}^{-1}$  were co-added for each spectrum. Gaseous sample was mixed by passing through a flow of argon or nitrogen gas through a U-trap ( $-32$  °C) containing ca. 20 mg of the freshly prepared precursor ( $C_2H_4O_2PNCO$  or  $C_2H_4O_2PN_3$ ). Then the mixture (sample : dilution gas = 1:1000, estimated) was passed through an  $Al_2O_3$  tube furnace (o.d. 2.0 mm, i.d. 1.0 mm), which can be heated over a length of ca. 25 mm by tantalum wire (o.d. 2.0 mm, resistance 0.4  $\Omega$ , voltage 7.50 V, and current 3.46 A). The resulting pyrolysis products were immediately deposited ( $2 \text{ mmol h}^{-1}$ ) in a high vacuum ( $\sim 10^{-6}$  pa) onto the gold-plated copper block matrix support (10 K for  $N_2$  and Ar matrix) using a closed-cycle helium cryostat (Sumitomo Heavy Industries, SRDK-408D2-F50H) inside the vacuum chamber. Temperatures at the second stage of the cold head were controlled using an East Changing TC 290 digital cryogenic temperature controller a Silicon Diode (DT-670). Photolysis experiments were performed using

ArF excimer laser (Gamlaser EX5/250, 193 nm, 3 Hz), Nd<sup>3+</sup>: YAG laser (MPL-F-266, 266 nm, 10 mW), and UV flashlight (Boyu, 365 nm, 24 W).

### **Matrix-isolation UV-vis spectroscopy**

Matrix UV-vis spectra were recorded on a PerkinElmer Lambda 850+ spectrometer (190–800 nm, scanning speed of 1 nm s<sup>-1</sup>). The high-vacuum flash pyrolysis products using the similar Al<sub>2</sub>O<sub>3</sub> furnace (o.d 2.0 mm, i.d. 1.0 mm) were deposited onto a CaF<sub>2</sub> matrix support (10 K) using a closed-cycle helium cryostat (Sumitomo Heavy Industries, SRDK-408D2-F50H) inside the vacuum chamber. Temperatures at the second stage of the cold head were controlled using a Lake Shore 335 digital cryogenic temperature controller a Silicon Diode (DT-670).

### **Quantum chemical calculation methods**

Structures and IR frequencies for stationary points were calculated using the (unrestricted) DFT B3LYP<sup>[1]</sup>, BP86<sup>[2]</sup> and MPW1PW91<sup>[3]</sup> methods with the 6-311++G(3df, 3pd) basis set. Relative energies of the species were further estimated using the complete basis set (CBS-QB3).<sup>[4]</sup> Local minima were confirmed by vibrational frequency analysis, and transition states were ascertained with additional intrinsic reaction coordinate (IRC) calculations.<sup>[5]</sup> Time-dependent TD-B3LYP/6-311+G(3df)<sup>[6]</sup> method was performed for the calculation of the vertical excitation energies. All these computations were performed using the Gaussian 09 software package.<sup>[7]</sup> Further calculations on the single-point energies for all the species on the potential energy profiles were carried out at the (U)CCSD(T)-F12a/aug-cc-pVTZ<sup>[8]</sup> level. IR frequencies and intensities of O<sub>2</sub>PNCO with configuration-selective vibrational configuration interaction theory (VCI)<sup>[9]</sup> analysis was obtained at the CCSD(T)-F12a/cc-pVTZ-F12 level. IR frequencies and intensities of O<sub>2</sub>PN and OPNO with second-order vibrational perturbation theory (VPT2)<sup>[10]</sup> were obtained at the (U)CCSD(T)-F12a/cc-pVTZ-F12 level. All these ab initio calculations were performed with the MOLPRO 2015 package.<sup>[11]</sup>

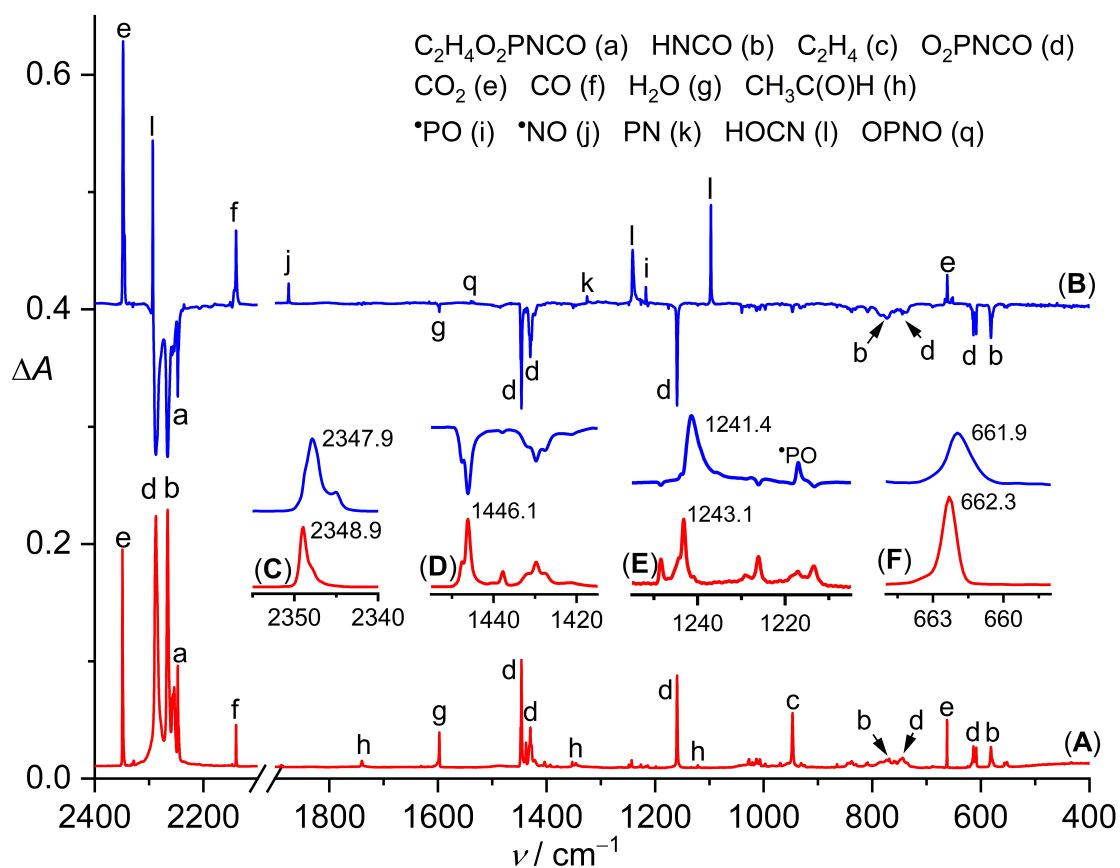

**Figure S1.** (A) IR spectrum of  $N_2$ -matrix isolated HVFP (ca. 1000 K) products of  $C_2H_4O_2PNCO$  (a) at 10 K. (B) IR difference spectrum showing the change of  $N_2$ -matrix containing the HVFP products of a upon 193 nm laser irradiation (20 min) at 10 K. (C–F) Parts of the expanded IR spectra showing the shifts of the IR bands for  $CO_2$  due to weak interaction with OPN in the matrix.

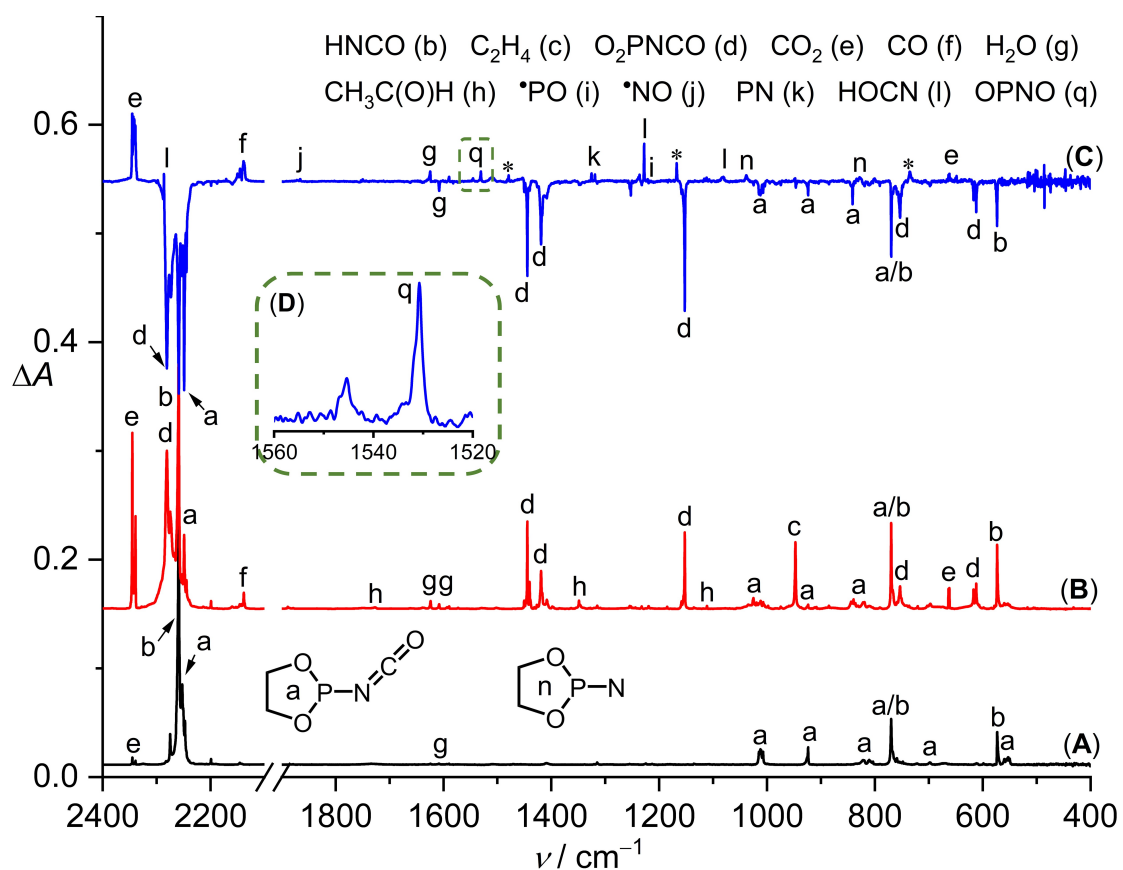

**Figure S2.** (A) IR spectrum of Ar-matrix isolated C<sub>2</sub>H<sub>4</sub>O<sub>2</sub>PNCO (a) at 10 K. (B) IR spectrum of Ar-matrix isolated high vacuum flash pyrolysis (HVFP, ca. 1000K) products of a at 10 K. (C) IR difference spectrum showing the change of Ar-matrix containing HVFP products of a upon 193 nm laser irradiation (4 min) at 10 K.

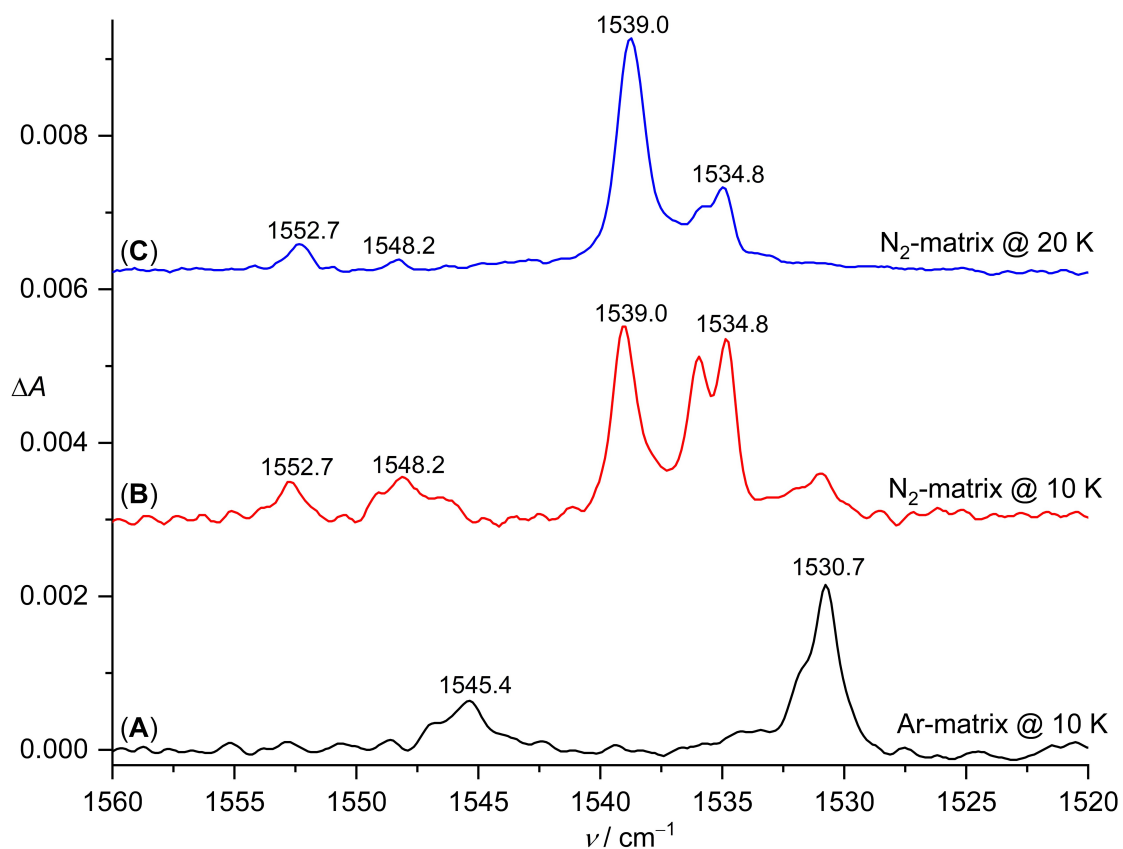

**Figure S3.** Parts of the IR spectra ( $1560\text{--}1520\text{ cm}^{-1}$ ) showing the formation of OPNO during the photochemistry of  $\text{O}_2\text{PNCO}$  in Ar-matrix at 10 K (spectrum A), in  $\text{N}_2$ -matrix at 10 K (spectrum B), and in  $\text{N}_2$ -matrix at 20 K (spectrum C). For the experiment at 20 K, the  $\text{N}_2$ -matrix (10 K) containing the HVFP products of  $\text{C}_2\text{H}_4\text{O}_2\text{PNCO}$  (a) was first warmed to 20 K, and then it was photolyzed with a 193 nm laser (4 min).

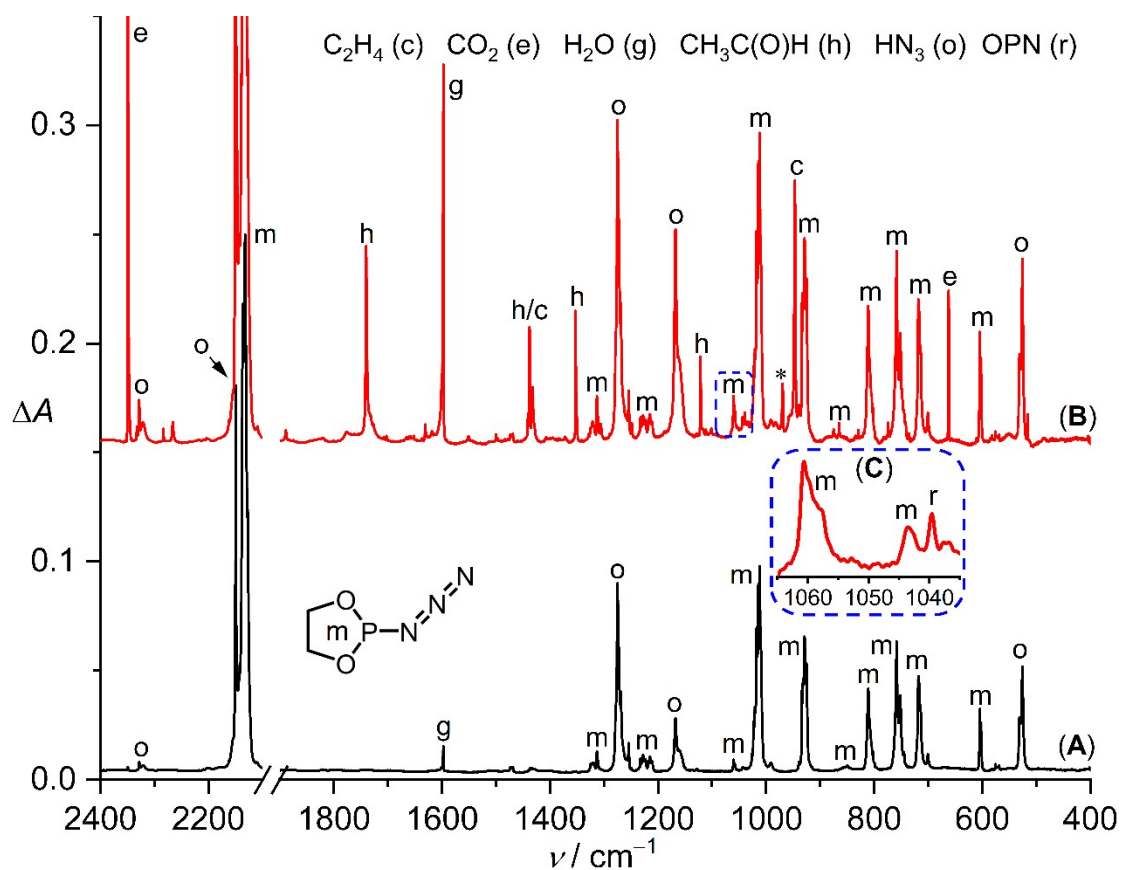

**Figure S4.** (A) IR spectrum of  $\text{N}_2$ -matrix isolated  $\text{C}_2\text{H}_4\text{O}_2\text{PN}_3$  (**m**) at 10 K. (B) IR spectrum of  $\text{N}_2$ -matrix isolated HVFP (ca. 1000 K) products of **m** at 10 K. (C) Part of the expanded IR spectrum B in the range of 1065–1035  $\text{cm}^{-1}$  showing the weak IR band of OPN.

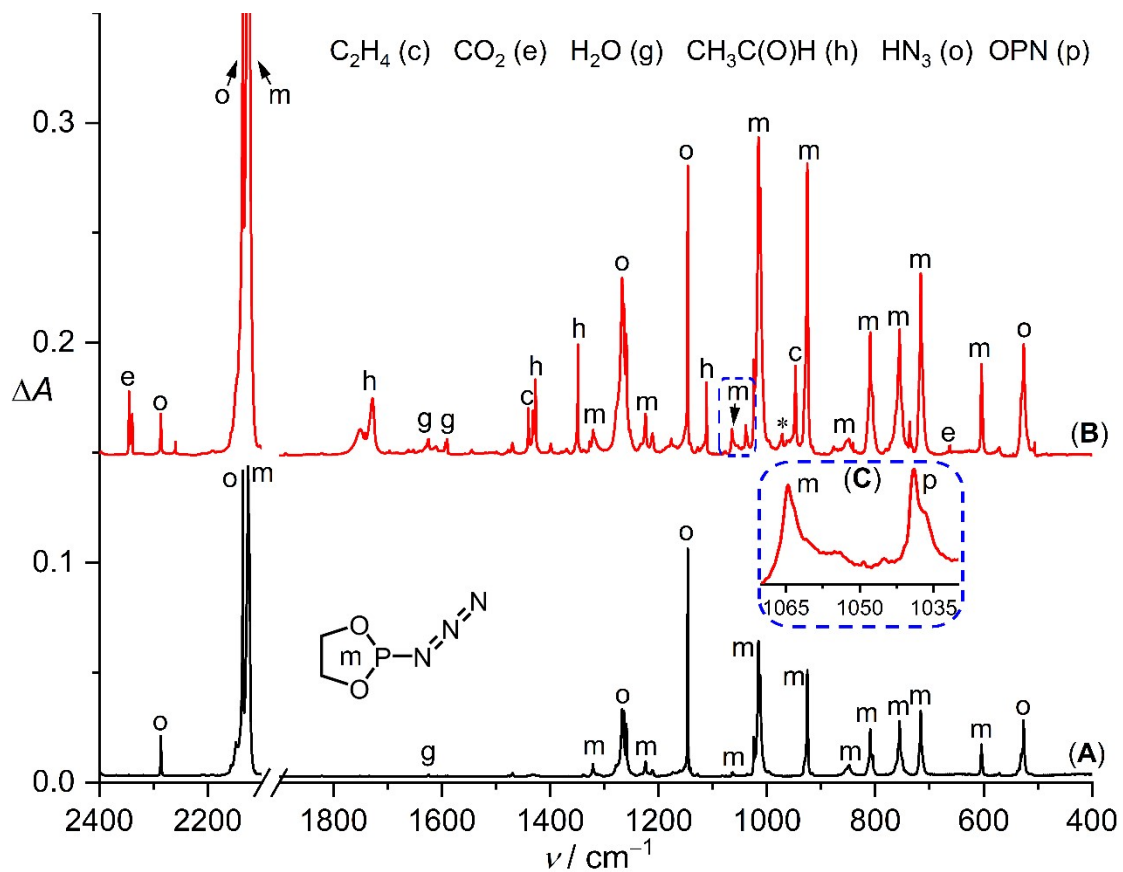

**Figure S5.** (A) IR spectrum of Ar-matrix isolated  $C_2H_4O_2PN_3$  (**m**) at 10 K. (B) IR spectrum of Ar-matrix isolated HVFP (ca. 1000 K) products of **m** at 10 K. (C) Part of the expanded IR spectrum B in the range of 1070–1030  $cm^{-1}$  showing the weak IR band of OPN.



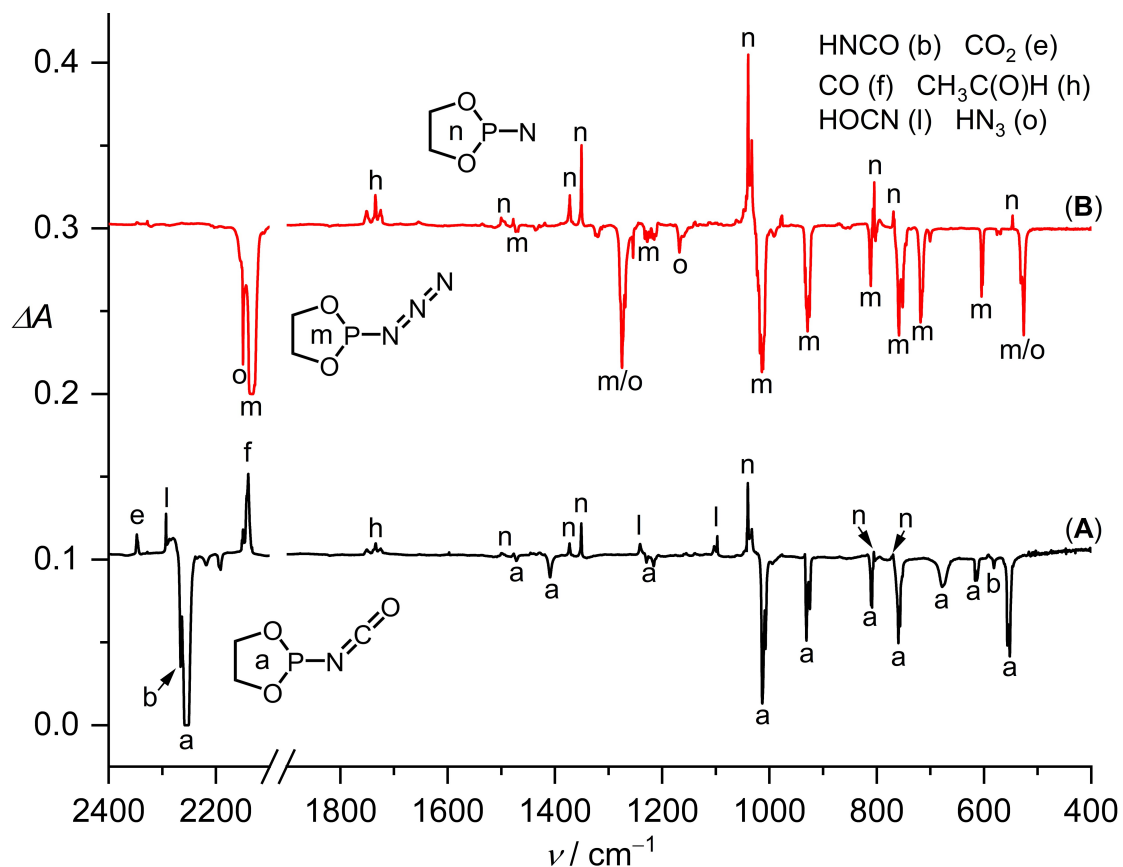

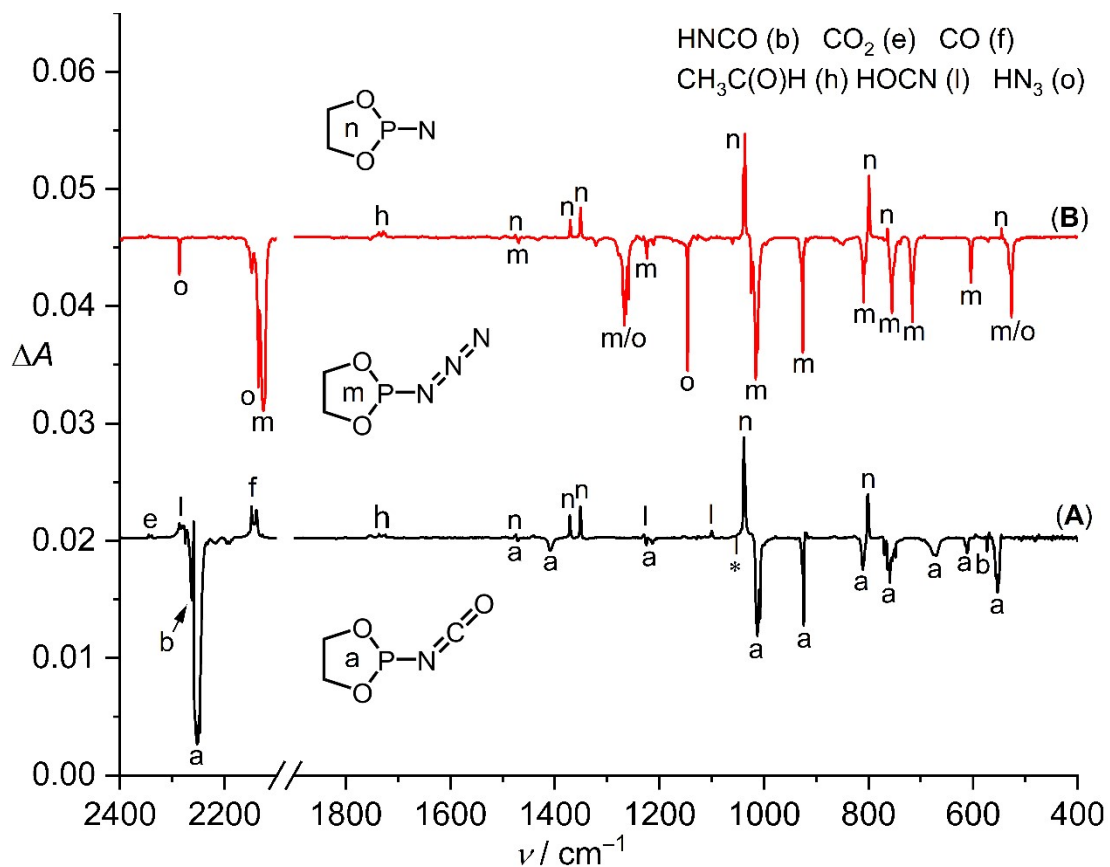

**Figure S7.** (A) IR difference spectrum showing the change of Ar-matrix isolated C<sub>2</sub>H<sub>4</sub>O<sub>2</sub>PNCO (a) upon 193 nm laser irradiation (4 min) at 10 K. (B) IR difference spectrum showing the change of Ar-matrix isolated C<sub>2</sub>H<sub>4</sub>O<sub>2</sub>PN<sub>3</sub> (m) upon 193 nm laser irradiation (2 min) at 10 K.

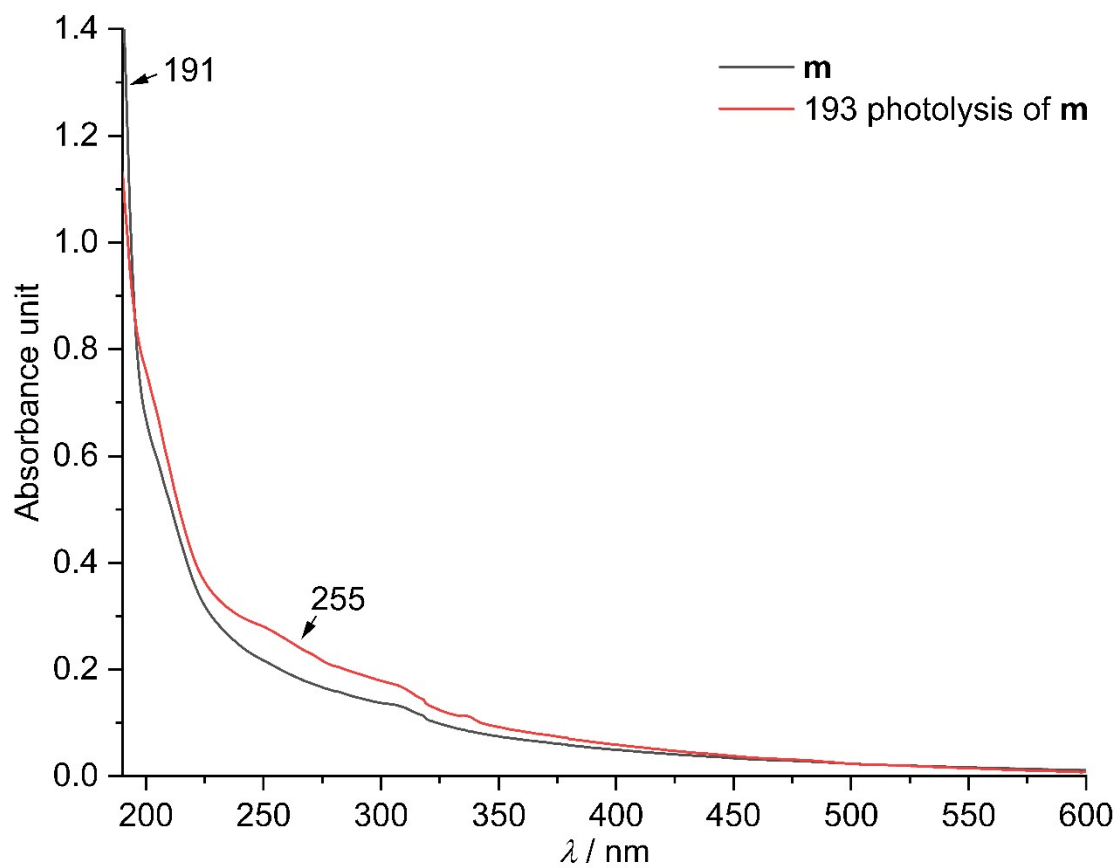

**Figure S8.** UV-Vis spectra of  $\text{N}_2$ -matrix isolated  $\text{C}_2\text{H}_4\text{O}_2\text{PN}_3$  (**m**) and its laser photolysis (193 nm) products at 10 K. The increased broad absorption in the range of 200-450 nm is assigned to the nitrene intermediate  $\text{C}_2\text{H}_4\text{O}_2\text{PN}$ .

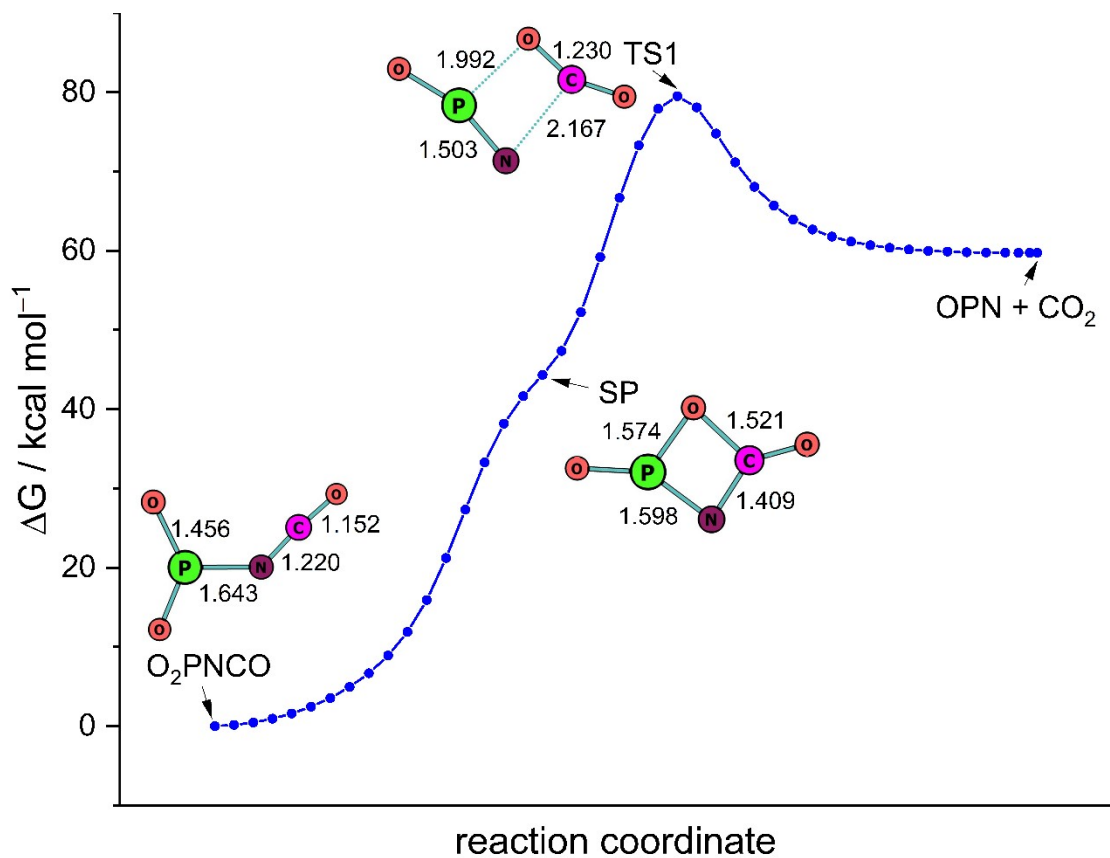

**Figure S9.** Calculated energy profile along intrinsic reaction coordinate (IRC) for the decomposition of  $O_2PNCO$  to  $OPN/CO_2$  via transition state TS1 at the B3LYP/6-311++G(3df, 3pd) level of theory. Bond lengths (Å) calculated at B3LYP/6-311++G(3df, 3pd) level of theory.

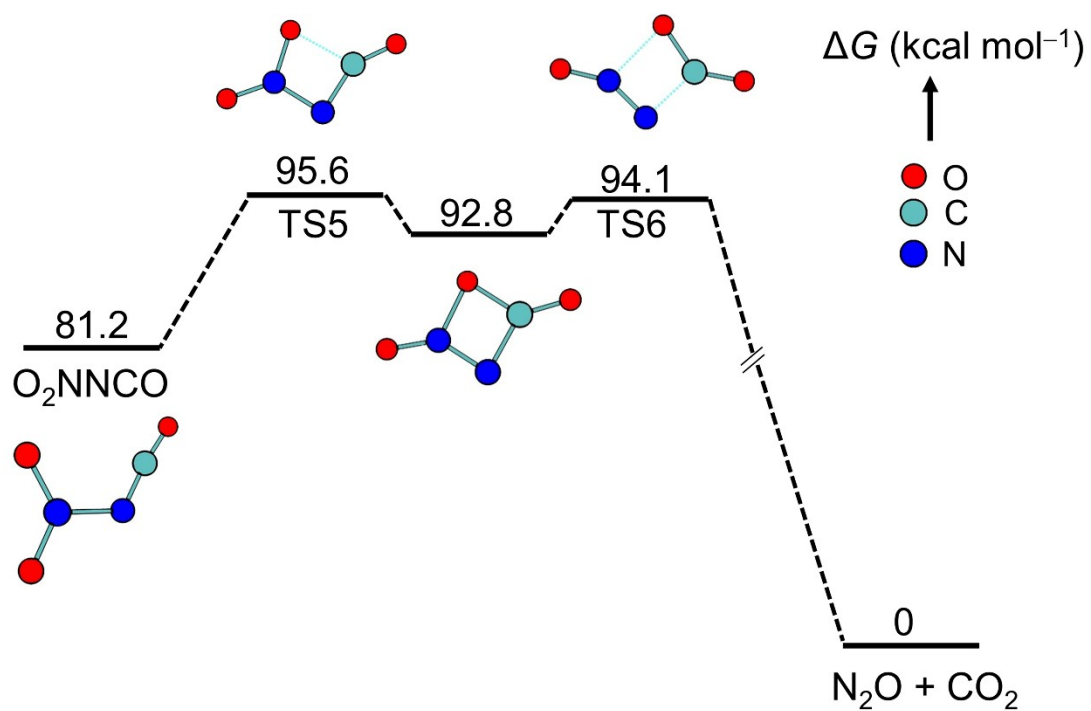

**Figure S10.** Calculated potential energy profile for the decomposition of O<sub>2</sub>NNCO at the B3LYP/6-311++G(3df, 3pd) level of theory.

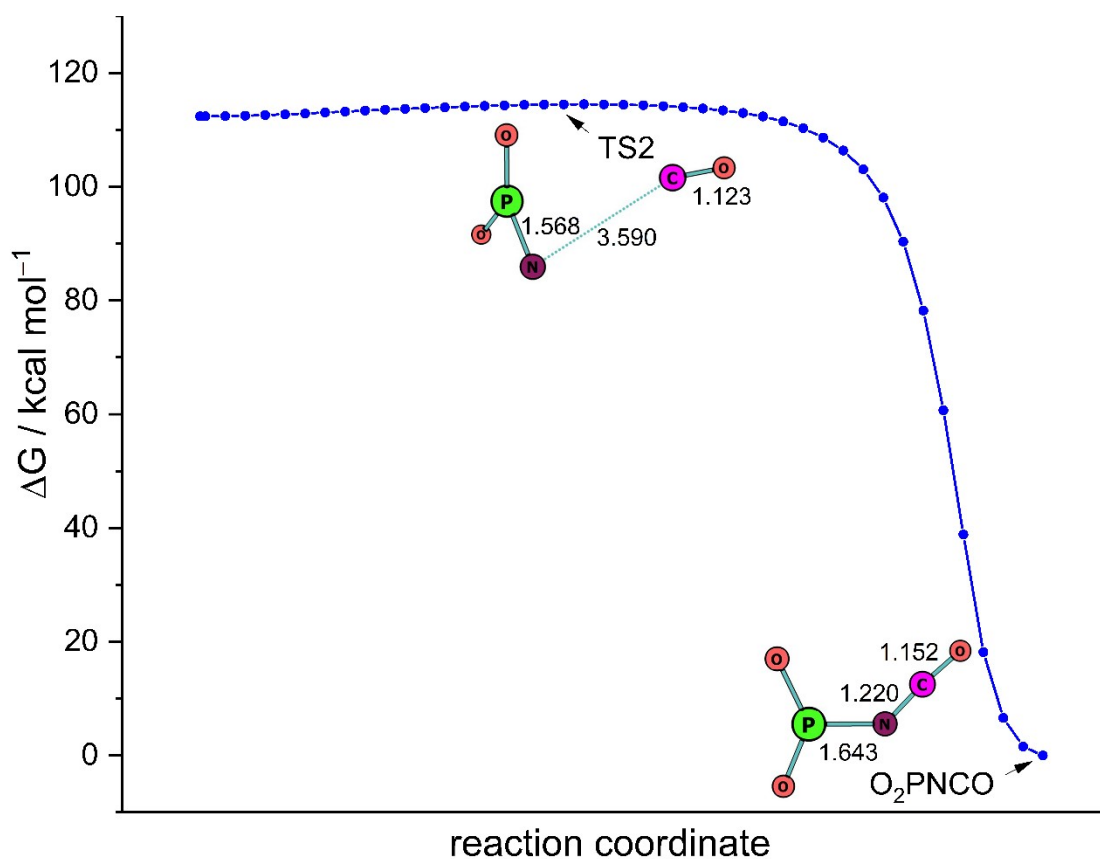

**Figure S11.** Calculated energy profile along intrinsic reaction coordinate (IRC) for the decomposition of  $\text{O}_2\text{PNCO}$  to  $\text{O}_2\text{PN/CO}$  via transition state TS2 at the B3LYP/6-311++G(3df, 3pd) level of theory. Bond lengths ( $\text{\AA}$ ) calculated at B3LYP/6-311++G(3df, 3pd) level of theory.

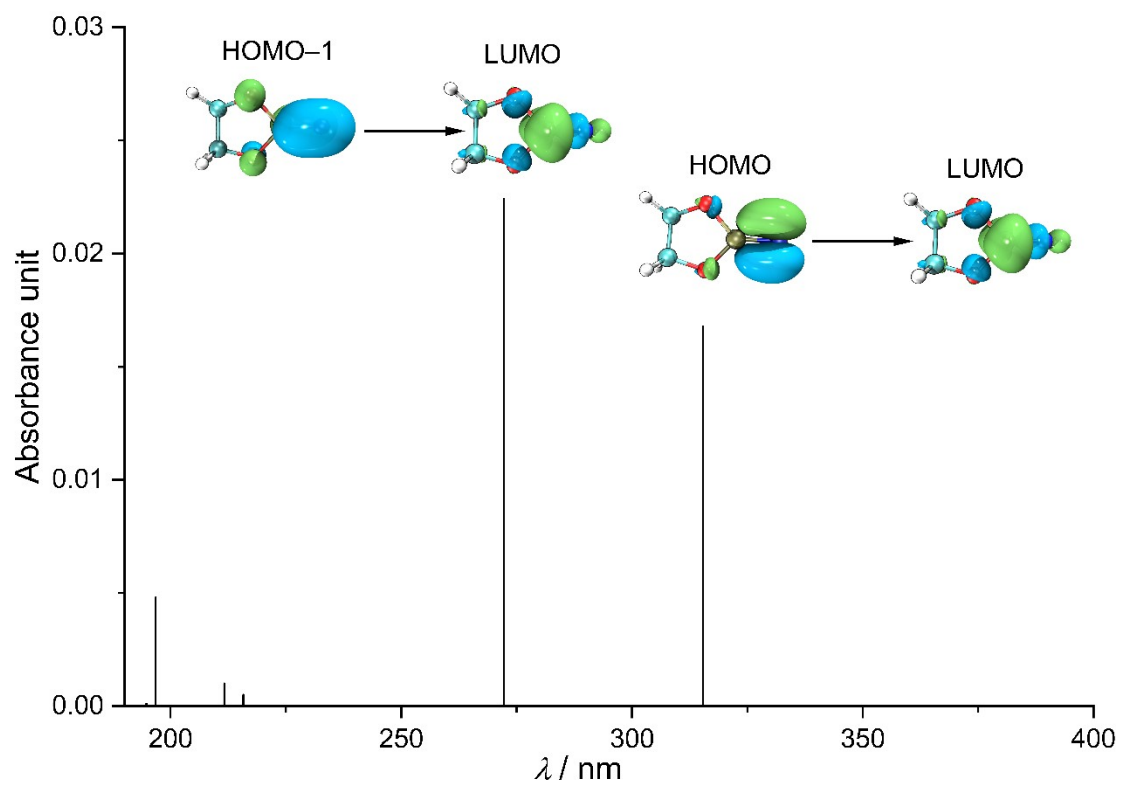

**Figure S12.** TD-B3LYP/6-311++G(3df, 3pd) calculated vertical transition energies of singlet  $C_2H_4O_2PN$ . Molecular orbitals for the dominant excitations are depicted.

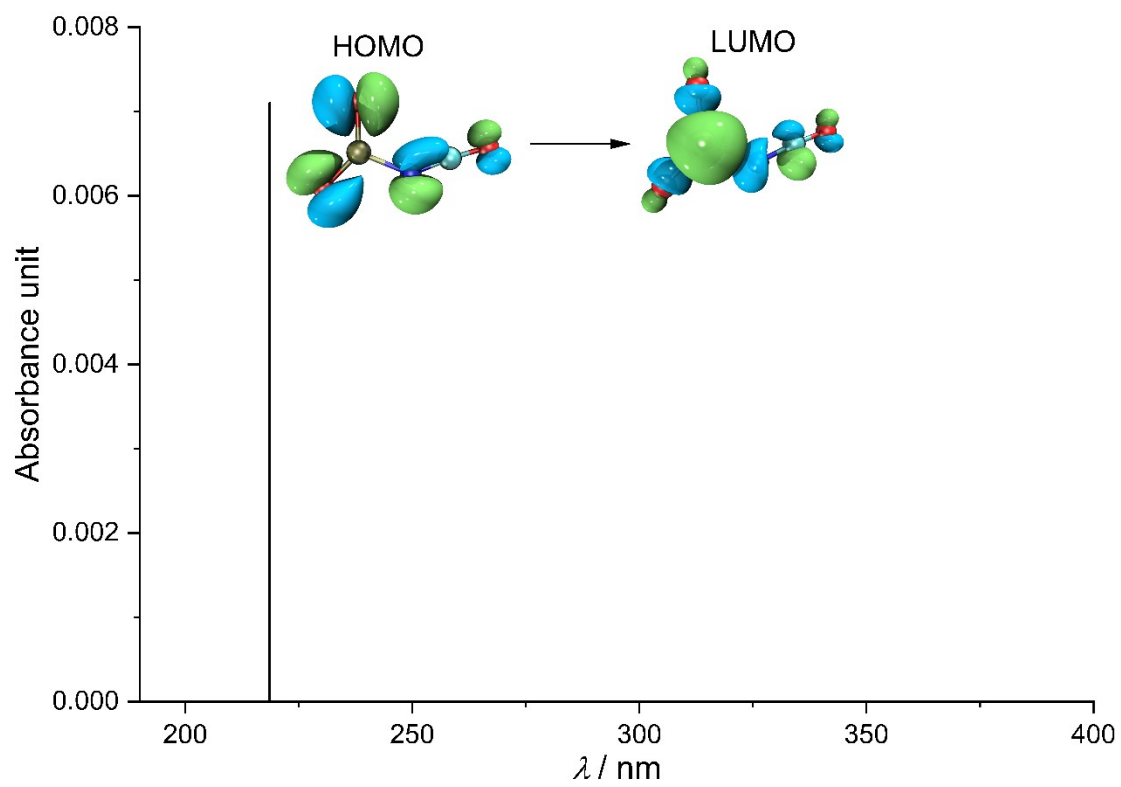

**Figure S13.** TD-B3LYP/6-311++G(3df, 3pd) calculated vertical transition energies of O<sub>2</sub>PNCO. Molecular orbitals for the dominant excitations are depicted.



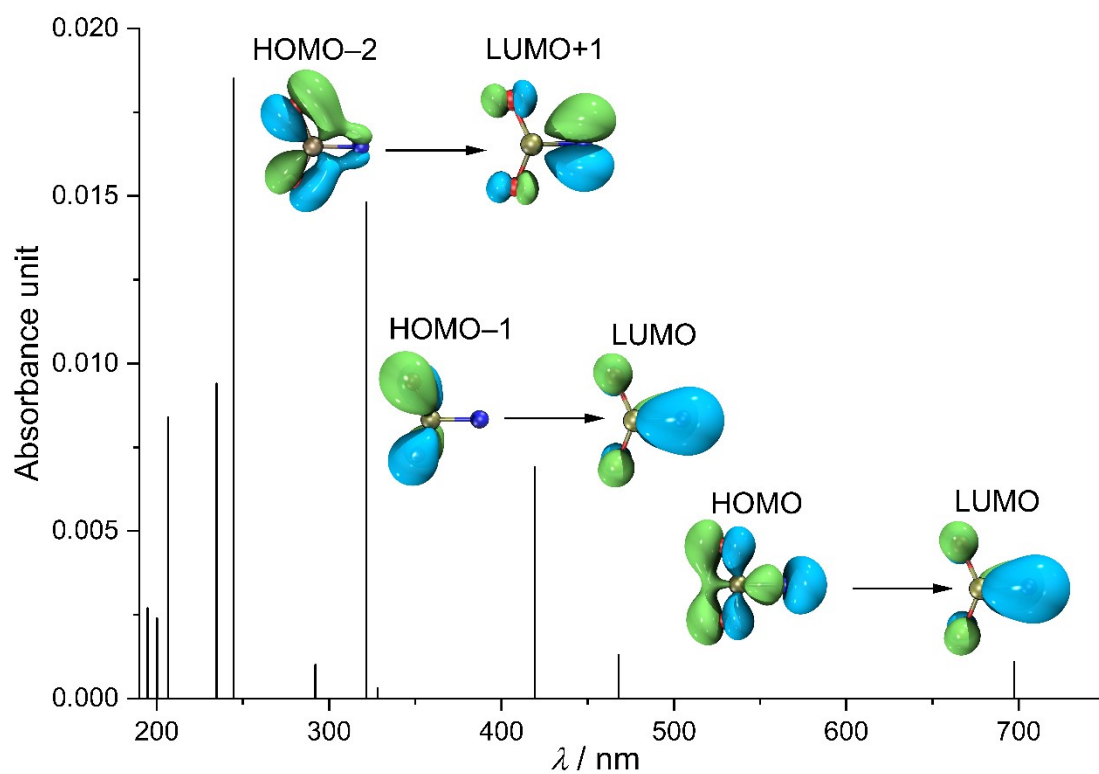

**Figure S14.** TD-B3LYP/6-311++G(3df, 3pd) calculated vertical transition energies of triplet  $\text{O}_2\text{PN}$ . Molecular orbitals for the dominant excitations are depicted.

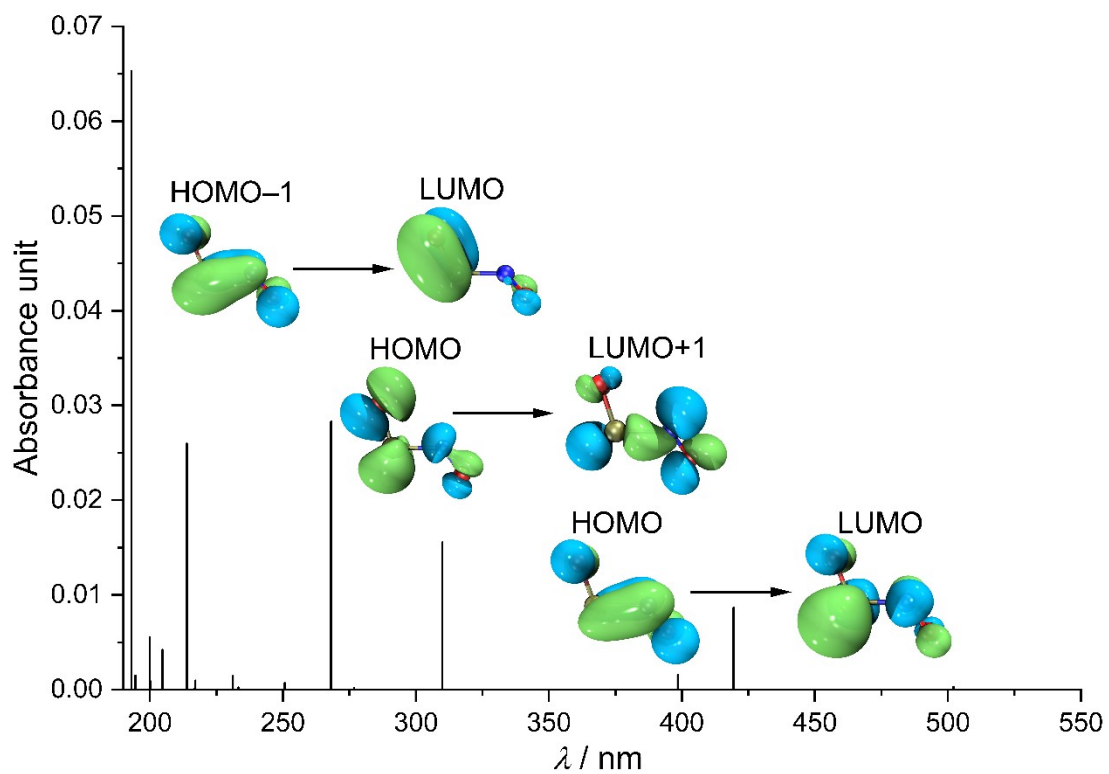

**Figure S15.** TD-B3LYP/6-311++G(3df, 3pd) calculated vertical transition energies of triplet *trans*-OPNO. Molecular orbitals for the dominant excitations are depicted.

**Table S1.** Calculated vibrational frequencies ( $\text{cm}^{-1}$ , unscaled) and intensities ( $\text{km mol}^{-1}$ , in parentheses) of  $\text{O}_2\text{PNCO}$ .

| VPT2 <sup>[a]</sup> | VCI <sup>[a]</sup> | B3LYP <sup>[b]</sup> | MPW1PW91 <sup>[b]</sup> | BP86 <sup>[b]</sup> |
|---------------------|--------------------|----------------------|-------------------------|---------------------|
| 2277.2              | 2280.8 (1035)      | 2354 (1328)          | 2390 (1324)             | 2289 (1092)         |
| 1451.6              | 1451.9 (266)       | 1467 (154)           | 1488 (177)              | 1404 (104)          |
| 1407.3              | 1407.8 (116)       | 1459 (175)           | 1484 (168)              | 1399 (161)          |
| 1156.9              | 1157.6 (159)       | 1164 (141)           | 1189 (142)              | 1110 (121)          |
| 765.0               | 765.1 (121)        | 739 (108)            | 765 (108)               | 705 (93)            |
| 625.5               | 622.9 (46)         | 632 (26)             | 645 (26)                | 596 (17)            |
| 618.5               | 616.9 (52)         | 621 (53)             | 632 (48)                | 590 (44)            |
| 435.2               | 435.3 (92)         | 430 (59)             | 437 (62)                | 406 (47)            |
| 423.6               | 423.7 (80)         | 421 (47)             | 432 (48)                | 394 (36)            |
| 380.7               | 381.1 (9)          | 382 (7)              | 385 (7)                 | 363 (6)             |
| 96.1                | 96.6 (1)           | 92 (< 1)             | 92 (< 1)                | 90 (< 1)            |
| 82.6                | 81.6 (2)           | 84 (1)               | 83 (1)                  | 78 (1)              |

[a] Anharmonic frequencies obtained with the CCSD(T)-F12/cc-pVTZ-F12 method. Abnormal IR intensities were obtained with the VPT2 method. [b] Harmonic frequencies obtained at the 6-311++G(3df, 3pd) basis set.

**Table S2.** Calculated IR spectra of O<sub>2</sub>PN and OPNO.

| triplet O <sub>2</sub> PN |                          |                            | singlet O <sub>2</sub> PN |                          |                            | triplet <i>trans</i> -OPNO |                          |                            | singlet <i>trans</i> -OPNO |                          |                            |
|---------------------------|--------------------------|----------------------------|---------------------------|--------------------------|----------------------------|----------------------------|--------------------------|----------------------------|----------------------------|--------------------------|----------------------------|
| B3LYP <sup>[a]</sup>      |                          | VPT2 <sup>[b]</sup>        | B3LYP <sup>[a]</sup>      |                          | VPT2 <sup>[b]</sup>        | B3LYP <sup>[a]</sup>       |                          | VPT2 <sup>[b]</sup>        | B3LYP <sup>[a]</sup>       |                          | VPT2 <sup>[b]</sup>        |
| <i>v</i> <sub>harm</sub>  | <i>v</i> <sub>harm</sub> | <i>v</i> <sub>anharm</sub> | <i>v</i> <sub>harm</sub>  | <i>v</i> <sub>harm</sub> | <i>v</i> <sub>anharm</sub> | <i>v</i> <sub>harm</sub>   | <i>v</i> <sub>harm</sub> | <i>v</i> <sub>anharm</sub> | <i>v</i> <sub>harm</sub>   | <i>v</i> <sub>harm</sub> | <i>v</i> <sub>anharm</sub> |
| 1427 (113)                | 1451.7 (168)             | 1431.1                     | 1470 (122)                | 1469.5 (211)             | 1448.0                     | 1602 (185)                 | 1575.6 (30)              | 1572.8                     | 1722 (355)                 | 1660.0 (212)             | 1622.8                     |
| 1140 (17)                 | 1152.5 (60)              | 1134.5                     | 1082 (8)                  | 1065.3 (7)               | 1048.4                     | 1255 (118)                 | 1263.5 (195)             | 1246.5                     | 1233 (134)                 | 1242.2 (243)             | 1226.6                     |
| 743 (< 1)                 | 755.5 (21)               | 729.8                      | 995 (6)                   | 982.9 (36)               | 973.2                      | 547 (52)                   | 611.0 (174)              | 595.0                      | 581 (18)                   | 574.1 (194)              | 521.6                      |
| 418 (44)                  | 424.5 (79)               | 416.2                      | 384 (35)                  | 371.7 (71)               | 366.4                      | 375 (4)                    | 390.0 (< 1)              | 387.4                      | 473 (3)                    | 460.7 (4)                | 437.0                      |
| 362 (59)                  | 369.1 (96)               | 348.7                      | 364 (45)                  | 355.9 (86)               | 353.7                      | 240 (6)                    | 241.6 (17)               | 240.1                      | 183 (5)                    | 173.0 (10)               | 151.2                      |
| 264 (5)                   | 282.1 (16)               | 277.1                      | 253 (5)                   | 296.0 (19)               | 285.5                      | 199 (1)                    | 196.4 (2)                | 201.9                      | 170 (3)                    | 134.9 (14)               | 91.6                       |

[a] Calculated vibrational frequencies (cm<sup>-1</sup>) and intensities (km mol<sup>-1</sup>, parentheses) at the 6-311++G(3df, 3pd) basis set. [b] Calculated VPT2 IR frequencies (cm<sup>-1</sup>) and intensities (km mol<sup>-1</sup>, parentheses) at the CCSD(T)-F12a/cc-pVTZ-F12 level.

**Table S3.** Calculated and observed IR spectra of C<sub>2</sub>H<sub>4</sub>O<sub>2</sub>PN.

| B3LYP <sup>[a]</sup> |            | MPW1PW91 <sup>[a]</sup> |            | BP86 <sup>[a]</sup> |            | Obs. <sup>[b]</sup> |                        |
|----------------------|------------|-------------------------|------------|---------------------|------------|---------------------|------------------------|
| singlet              | triplet    | singlet                 | triplet    | singlet             | triplet    | Ar-matrix           | N <sub>2</sub> -matrix |
| 3137 (12)            | 3128 (15)  | 3162 (11)               | 3152 (14)  | 3058 (13)           | 3051 (11)  | n.o.                | n.o.                   |
| 3123 (11)            | 3107 (10)  | 3149 (10)               | 3132 (10)  | 3045 (11)           | 3031 (9)   | n.o.                | n.o.                   |
| 3062 (21)            | 3061 (36)  | 3084 (20)               | 3081 (36)  | 2982 (24)           | 2980 (29)  | n.o.                | n.o.                   |
| 3059 (33)            | 3055 (16)  | 3081 (32)               | 3074 (16)  | 2977 (34)           | 2977 (14)  | n.o.                | n.o.                   |
| 1522 (< 1)           | 1518 (1)   | 1524 (< 1)              | 1519 (1)   | 1463 (< 1)          | 1456 (1)   | n.o.                | n.o.                   |
| 1515 (4)             | 1506 (4)   | 1515 (5)                | 1505 (5)   | 1457 (4)            | 1443 (5)   | 1494.2              | 1500.3                 |
| 1405 (66)            | 1374 (< 1) | 1434 (89)               | 1383 (< 1) | 1348 (48)           | 1316 (1)   | 1370.6              | 1372.7                 |
| 1382 (29)            | 1366 (< 1) | 1394 (13)               | 1369 (< 1) | 1328 (32)           | 1305 (< 1) | 1350.7              | 1350.8                 |
| 1377 (< 1)           | 1247 (2)   | 1379 (< 1)              | 1255 (2)   | 1319 (< 1)          | 1198 (< 1) | n.o.                | n.o.                   |
| 1252 (7)             | 1234 (2)   | 1260 (7)                | 1244 (2)   | 1207 (5)            | 1186 (1)   | 1242.6              | n.o.                   |
| 1243 (3)             | 1139 (< 1) | 1254 (3)                | 1144 (1)   | 1198 (2)            | 1087 (< 1) | 1230.2              | 1230.0                 |
| 1143 (4)             | 1007 (148) | 1149 (14)               | 1053 (176) | 1098 (4)            | 961 (15)   | 1126.1              | n.o.                   |
| 1044 (234)           | 1003 (6)   | 1088 (241)              | 1041 (5)   | 999 (165)           | 959 (55)   | 1036.8              | 1040.3                 |
| 1034 (15)            | 918 (66)   | 1072 (15)               | 943 (47)   | 990 (11)            | 880 (56)   | n.o.                | 1032.9                 |
| 929 (63)             | 854 (2)    | 951 (49)                | 864 (3)    | 898 (67)            | 822 (2)    | 924.0               | n.o.                   |
| 873 (7)              | 773 (49)   | 887 (12)                | 802 (53)   | 846 (7)             | 730 (16)   | 867.0               | n.o.                   |
| 784 (131)            | 732 (100)  | 809 (127)               | 758 (100)  | 740 (115)           | 707 (29)   | 799.2               | 805.5                  |
| 754 (31)             | 688 (1)    | 779 (32)                | 696 (1)    | 705 (36)            | 694 (79)   | 763.7               | 769.7                  |
| 636 (< 1)            | 643 (< 1)  | 641 (< 1)               | 649 (< 1)  | 603 (1)             | 614 (2)    | n.o.                | n.o.                   |
| 547 (13)             | 526 (32)   | 553 (13)                | 533 (33)   | 521 (14)            | 498 (27)   | 545.5               | 547.4                  |
| 310 (14)             | 328 (11)   | 322 (15)                | 334 (11)   | 299 (11)            | 318 (7)    | n.o.                | n.o.                   |
| 287 (6)              | 246 (14)   | 295 (7)                 | 256 (13)   | 273 (4)             | 196 (11)   | n.o.                | n.o.                   |
| 178 (< 1)            | 160 (9)    | 183 (< 1)               | 168 (8)    | 184 (< 1)           | 151 (9)    | n.o.                | n.o.                   |
| 136 (< 1)            | 90 (2)     | 138 (< 1)               | 94 (2)     | 134 (< 1)           | 89 (2)     | n.o.                | n.o.                   |

[a] Calculated harmonic vibrational frequencies (cm<sup>-1</sup>) and intensities (km mol<sup>-1</sup>, in parentheses) at the 6-311++G(3df, 3pd) basis set. [b] Observed band positions (> 400 cm<sup>-1</sup>) for the most intense matrix sites.

**Table S4.** Calculated vertical excitation energies and oscillator strength of O<sub>2</sub>PNCO and O<sub>2</sub>PN at TD-DFT B3LYP/6-311++G(3df, 3pd) level of theory.

| O <sub>2</sub> PNCO |                     | triplet O <sub>2</sub> PN |                     | singlet O <sub>2</sub> PN |                     |
|---------------------|---------------------|---------------------------|---------------------|---------------------------|---------------------|
| $\lambda/\text{nm}$ | oscillator strength | $\lambda/\text{nm}$       | oscillator strength | $\lambda/\text{nm}$       | oscillator strength |
| 237.43              | 0.0000              | 697.38                    | 0.0011              | 854.70                    | 0.0002              |
| 236.08              | 0.0000              | 467.99                    | 0.0000              | 601.60                    | 0.0000              |
| 229.22              | 0.0000              | 467.91                    | 0.0013              | 527.11                    | 0.0000              |
| 222.92              | 0.0000              | 419.31                    | 0.0069              | 357.01                    | 0.0024              |
| 218.61              | 0.0071              | 328.11                    | 0.0003              | 332.32                    | 0.0000              |
| 213.98              | 0.0000              | 321.59                    | 0.0148              | 297.07                    | 0.0002              |
| 210.48              | 0.0000              | 292.12                    | 0.0010              | 278.40                    | 0.0000              |
| 202.44              | 0.0000              | 244.69                    | 0.0185              | 262.35                    | 0.0000              |
| 199.82              | 0.0000              | 242.95                    | 0.0000              | 253.14                    | 0.0033              |
| 199.52              | 0.0000              | 234.75                    | 0.0094              | 247.62                    | 0.0101              |
| 195.27              | 0.0000              | 218.41                    | 0.0000              | 240.61                    | 0.0000              |
| 190.73              | 0.0000              | 210.07                    | 0.0000              | 213.87                    | 0.0180              |
|                     |                     | 206.65                    | 0.0084              | 213.24                    | 0.0000              |
|                     |                     | 202.23                    | 0.0000              | 210.27                    | 0.0000              |
|                     |                     | 200.27                    | 0.0024              | 210.04                    | 0.0000              |
|                     |                     | 198.87                    | 0.0000              | 200.95                    | 0.0000              |
|                     |                     | 194.76                    | 0.0027              | 197.07                    | 0.0020              |
|                     |                     |                           |                     | 193.80                    | 0.0000              |
|                     |                     |                           |                     | 193.04                    | 0.0029              |

**Table S5.** Calculated vertical excitation energies and oscillator strength of OPNO at TD-DFT B3LYP/6-311++G(3df, 3pd) level of theory.

| singlet <i>cis</i> -OPNO |                     | triplet <i>cis</i> -OPNO |                     | singlet <i>trans</i> -OPNO |                     | triplet <i>trans</i> -OPNO |                     |
|--------------------------|---------------------|--------------------------|---------------------|----------------------------|---------------------|----------------------------|---------------------|
| $\lambda/\text{nm}$      | oscillator strength | $\lambda/\text{nm}$      | oscillator strength | $\lambda/\text{nm}$        | oscillator strength | $\lambda/\text{nm}$        | oscillator strength |
| 10155.26                 | 0.0000              | 466.07                   | 0.0000              | 2811.24                    | 0.0001              | 502.04                     | 0.0005              |
| 1021.90                  | 0.0000              | 404.37                   | 0.0024              | 642.98                     | 0.0000              | 419.48                     | 0.0144              |
| 657.66                   | 0.0004              | 398.23                   | 0.0156              | 495.99                     | 0.0000              | 398.46                     | 0.0026              |
| 420.70                   | 0.0000              | 312.30                   | 0.0411              | 422.03                     | 0.0057              | 309.93                     | 0.0259              |
| 364.57                   | 0.0000              | 285.25                   | 0.0000              | 302.57                     | 0.0000              | 276.73                     | 0.0003              |
| 320.01                   | 0.0000              | 275.04                   | 0.0294              | 286.37                     | 0.0000              | 268.09                     | 0.0472              |
| 296.46                   | 0.0019              | 252.78                   | 0.0024              | 281.10                     | 0.0100              | 250.63                     | 0.0012              |
| 287.58                   | 0.0000              | 235.90                   | 0.0002              | 279.23                     | 0.0000              | 233.23                     | 0.0004              |
| 279.71                   | 0.0000              | 234.39                   | 0.0039              | 269.05                     | 0.0029              | 231.19                     | 0.0024              |
| 271.56                   | 0.0391              | 223.83                   | 0.0009              | 233.72                     | 0.0000              | 217.04                     | 0.0016              |
| 241.50                   | 0.0050              | 216.57                   | 0.0178              | 230.08                     | 0.0127              | 216.73                     | 0.0002              |
| 239.51                   | 0.1418              | 209.71                   | 0.0034              | 216.35                     | 0.0005              | 213.85                     | 0.0433              |
| 232.94                   | 0.0000              | 205.18                   | 0.0033              | 212.84                     | 0.0000              | 204.67                     | 0.0070              |
| 232.23                   | 0.0000              | 203.89                   | 0.0051              | 212.07                     | 0.3242              | 200.11                     | 0.0015              |
| 231.53                   | 0.0000              | 198.83                   | 0.0030              | 205.66                     | 0.0000              | 199.99                     | 0.0092              |
| 221.12                   | 0.1549              | 192.14                   | 0.0538              | 203.22                     | 0.0000              | 194.55                     | 0.0025              |
| 205.95                   | 0.0000              | 190.54                   | 0.0096              | 197.30                     | 0.0094              | 193.05                     | 0.1088              |
| 205.01                   | 0.0026              |                          |                     | 194.18                     | 0.0000              |                            |                     |
| 201.82                   | 0.0644              |                          |                     |                            |                     |                            |                     |
| 198.02                   | 0.0177              |                          |                     |                            |                     |                            |                     |
| 197.60                   | 0.0000              |                          |                     |                            |                     |                            |                     |
| 194.36                   | 0.0000              |                          |                     |                            |                     |                            |                     |

**Table S6.** Calculated vertical excitation energies and oscillator strength of C<sub>2</sub>H<sub>4</sub>O<sub>2</sub>PNCO, C<sub>2</sub>H<sub>4</sub>O<sub>2</sub>PN<sub>3</sub> and C<sub>2</sub>H<sub>4</sub>O<sub>2</sub>PN at TD-DFT B3LYP/6-311++G(3df, 3pd) level of theory.

| C <sub>2</sub> H <sub>4</sub> O <sub>2</sub> PNCO |                     | C <sub>2</sub> H <sub>4</sub> O <sub>2</sub> PN <sub>3</sub> |                     | triplet C <sub>2</sub> H <sub>4</sub> O <sub>2</sub> PN |                     | singlet C <sub>2</sub> H <sub>4</sub> O <sub>2</sub> PN |                     |
|---------------------------------------------------|---------------------|--------------------------------------------------------------|---------------------|---------------------------------------------------------|---------------------|---------------------------------------------------------|---------------------|
| λ/nm                                              | oscillator strength | λ/nm                                                         | oscillator strength | λ/nm                                                    | oscillator strength | λ/nm                                                    | oscillator strength |
| 257.48                                            | 0.0000              | 293.13                                                       | 0.0000              | 1027.19                                                 | 0.0005              | 366.12                                                  | 0.0000              |
| 237.44                                            | 0.0000              | 276.09                                                       | 0.0000              | 709.77                                                  | 0.0047              | 339.93                                                  | 0.0000              |
| 206.03                                            | 0.0375              | 263.88                                                       | 0.0000              | 341.59                                                  | 0.0143              | 315.33                                                  | 0.0168              |
| 205.73                                            | 0.0000              | 262.15                                                       | 0.0000              | 321.06                                                  | 0.0013              | 310.70                                                  | 0.0000              |
| 202.35                                            | 0.0000              | 244.98                                                       | 0.0002              | 316.98                                                  | 0.0002              | 292.37                                                  | 0.0000              |
| 199.79                                            | 0.0292              | 234.76                                                       | 0.0170              | 274.62                                                  | 0.0302              | 272.26                                                  | 0.0224              |
| 199.02                                            | 0.0000              | 229.46                                                       | 0.0162              | 257.02                                                  | 0.0030              | 258.96                                                  | 0.0000              |
| 193.22                                            | 0.0125              | 223.63                                                       | 0.0000              | 246.74                                                  | 0.0020              | 235.26                                                  | 0.0000              |
| 190.08                                            | 0.0239              | 211.43                                                       | 0.0000              | 241.19                                                  | 0.0036              | 215.81                                                  | 0.0005              |
|                                                   |                     | 201.66                                                       | 0.0000              | 234.22                                                  | 0.0089              | 212.38                                                  | 0.0000              |
|                                                   |                     | 199.25                                                       | 0.0800              | 229.54                                                  | 0.0021              | 211.67                                                  | 0.0010              |
|                                                   |                     | 195.84                                                       | 0.0000              | 224.97                                                  | 0.0014              | 207.78                                                  | 0.0000              |
|                                                   |                     | 194.26                                                       | 0.0000              | 216.13                                                  | 0.0010              | 204.26                                                  | 0.0000              |
|                                                   |                     | 193.02                                                       | 0.1315              | 200.21                                                  | 0.0053              | 197.35                                                  | 0.0000              |
|                                                   |                     | 190.47                                                       | 0.1303              | 197.46                                                  | 0.0124              | 196.79                                                  | 0.0048              |
|                                                   |                     |                                                              |                     | 196.48                                                  | 0.0140              | 194.78                                                  | 0.0001              |
|                                                   |                     |                                                              |                     | 191.20                                                  | 0.0407              |                                                         |                     |



**Table S7.** Calculated vibrational frequencies ( $\text{cm}^{-1}$ ) and intensities ( $\text{km mol}^{-1}$ , parentheses) of  $\text{O}_2\text{PNCO}$  isomers at the B3LYP/6-311++G(3df, 3pd) level of theory.

| 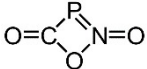 |  | $\text{O}_2\text{PCNO}$ | $\text{O}_2\text{POCN}$ | $\text{O}_2\text{NCPO}$ | $\text{O}_2\text{NOCP}$ | $\text{O}_2\text{NPCO}$ | $\text{OPC(O)NO}$ |
|-----------------------------------------------------------------------------------|-----------------------------------------------------------------------------------|-------------------------|-------------------------|-------------------------|-------------------------|-------------------------|-------------------|
| 1904 (305)                                                                        | 1904 (646)                                                                        | 2377 (1148)             | 2380 (122)              | 1557 (376)              | 1874 (340)              | 2109 (641)              | 1876 (212)        |
| 1668 (828)                                                                        | 1102 (74)                                                                         | 1477 (30)               | 1493 (150)              | 1330 (183)              | 1687 (121)              | 1562 (280)              | 1633 (52)         |
| 1092 (94)                                                                         | 1025 (82)                                                                         | 1465 (152)              | 1178 (237)              | 1266 (137)              | 1345 (717)              | 1328 (330)              | 1231 (88)         |
| 756 (11)                                                                          | 960 (178)                                                                         | 1154 (171)              | 1133 (96)               | 1177 (37)               | 876 (7)                 | 835 (67)                | 949 (21)          |
| 709 (12)                                                                          | 852 (10)                                                                          | 596 (196)               | 733 (103)               | 750 (12)                | 743 (356)               | 675 (21)                | 595 (10)          |
| 616 (16)                                                                          | 777 (11)                                                                          | 572 (4)                 | 555 (34)                | 741 (9)                 | 571 (4)                 | 619 (2)                 | 562 (26)          |
| 615 (4)                                                                           | 765 (21)                                                                          | 537 (5)                 | 501 (11)                | 555 (2)                 | 493 (< 1)               | 513 (8)                 | 428 (1)           |
| 580 (1)                                                                           | 711 (< 1)                                                                         | 407 (45)                | 404 (40)                | 316 (8)                 | 454 (8)                 | 463 (< 1)               | 296 (38)          |
| 489 (49)                                                                          | 609 (27)                                                                          | 382 (26)                | 403 (42)                | 278 (3)                 | 312 (1)                 | 356 (2)                 | 175 (5)           |
| 409 (14)                                                                          | 473 (8)                                                                           | 371 (3)                 | 366 (3)                 | 206 (11)                | 187 (3)                 | 296 (< 1)               | 161 (11)          |
| 313 (8)                                                                           | 438 (10)                                                                          | 94 (4)                  | 136 (4)                 | 105 (2)                 | 88 (< 1)                | 130 (1)                 | 103 (2)           |
| 172 (2)                                                                           | 192 (< 1)                                                                         | 68 (2)                  | 99 (6)                  | 98 (6)                  | 82 (1)                  | 68 (< 1)                | 54 (6)            |

**Table S8.** Calculated vibrational frequencies ( $\text{cm}^{-1}$ ) and intensities ( $\text{km mol}^{-1}$ , parentheses) of  $\text{O}_2\text{PN}$  isomers at the B3LYP/6-311++G(3df, 3pd) level of theory.

| <i>cyclic-O<sub>2</sub>P(≡N)</i> | triplet $\text{O}_2\text{NP}$ | singlet $\text{O}_2\text{NP}$ | <i>cyclic-O<sub>2</sub>N(≡P)</i> | <i>cyclic-OOPN</i>             | $(\text{P}=\text{N})(\text{O})_2$ |
|----------------------------------|-------------------------------|-------------------------------|----------------------------------|--------------------------------|-----------------------------------|
| 1449 (34)                        | 1528 (313)                    | 1422 (248)                    | 1269 (401)                       | 1045 (< 1)                     | 1065 (20)                         |
| 945 (37)                         | 1337 (144)                    | 1290 (213)                    | 957 (2)                          | 971 (62)                       | 840 (97)                          |
| 787 (12)                         | 828 (20)                      | 834 (2)                       | 626 (46)                         | 914 (< 1)                      | 824 (16)                          |
| 533 (22)                         | 550 (7)                       | 639 (< 1)                     | 398 (< 1)                        | 755 (29)                       | 679 (14)                          |
| 273 (15)                         | 407 (9)                       | 480 (1)                       | 351 (4)                          | 616 (14)                       | 476 (13)                          |
| 246 (17)                         | 226 (< 1)                     | 293 <i>i</i>                  | 261 <i>i</i>                     | 490 (9)                        | 211 (2)                           |
| singlet <i>cis</i> -OPNO         | triplet <i>cis</i> -OPNO      | triplet <i>cis</i> -OPON      | triplet <i>trans</i> -OPON       | triplet <i>cyclic</i> -OPN(=O) |                                   |
| 1695 (340)                       | 1620 (152)                    | 1293 (104)                    | 1301 (119)                       | 1210 (54)                      |                                   |
| 1259 (99)                        | 1243 (105)                    | 1076 (44)                     | 1117 (74)                        | 1004 (32)                      |                                   |
| 573 (22)                         | 489 (76)                      | 564 (153)                     | 605 (171)                        | 669 (13)                       |                                   |
| 288 (1)                          | 414 (3)                       | 459 (13)                      | 372 (5)                          | 548 (10)                       |                                   |
| 191 (2)                          | 237 (4)                       | 223 (4)                       | 229 (10)                         | 317 (15)                       |                                   |
| 66 (5)                           | 197 (3)                       | 196 (2)                       | 155 (3)                          | 250 (8)                        |                                   |

**Table S9.** Calculated relative energies (kcal mol<sup>-1</sup>) of OPNO.

|                            | B3LYP <sup>[a]</sup> | CBS-QB3 | CCSD(T) <sup>[b]</sup> |
|----------------------------|----------------------|---------|------------------------|
| singlet <i>cis</i> -OPNO   | 15                   | 10      | 7                      |
| triplet <i>cis</i> -OPNO   | 0.3                  | 0.5     | 0.6                    |
| singlet <i>trans</i> -OPNO | 13                   | 8       | 6                      |
| triplet <i>trans</i> -OPNO | 0                    | 0       | 0                      |

[a] At the B3LYP/6-311++G(3df, 3pd) level. [b] At the CCSD(T)-F12a/aug-cc-pVTZ level.

**Table S10.** Calculated vertical excitation energies and oscillator strength of HNCO isomers at TD-DFT B3LYP/6-311++G(3df, 3pd) level of theory.

| HNCO                |                     | HOCN                |                     | HCNO                |                     |
|---------------------|---------------------|---------------------|---------------------|---------------------|---------------------|
| $\lambda/\text{nm}$ | oscillator strength | $\lambda/\text{nm}$ | oscillator strength | $\lambda/\text{nm}$ | oscillator strength |
| 203.80              | 0.0000              | 202.94              | 0.0000              | 275.92              | 0.0000              |
| 198.29              | 0.0000              | 195.32              | 0.0000              | 246.35              | 0.0000              |
|                     |                     | 194.44              | 0.0018              | 246.35              | 0.0000              |
|                     |                     |                     |                     | 216.18              | 0.0000              |
|                     |                     |                     |                     | 216.18              | 0.0000              |
|                     |                     |                     |                     | 209.03              | 0.0000              |
|                     |                     |                     |                     | 209.03              | 0.0000              |

## References

- [1] A. D. Becke, *J. Chem. Phys.* 1993, **98**, 5648–5652.
- [2] A. D. Becke, *Phys. Rev. A* 1988, **38**, 3098–3100.
- [3] C. Adamo, V. Barone, *J. Chem. Phys.* 1998, **108**, 664.
- [4] Jr. J. A. Montgomery, M. J. Frisch, J. W. Ochterski, G. A. Petersson, *J. Chem. Phys.* 2000, **112**, 6532–6542.
- [5] (a) K. Fukui, *Acc. Chem. Res.* 1981, **4**, 363–368. (b) H. P. Hratchian, H. B. Schlegel, *J. Chem. Theory Comput.* 2005, **1**, 61–69.
- [6] (a) R. E. Stratmann, G. E. Scuseria, M. J. Frisch, *J. Chem. Phys.* 1998, **109**, 8218. (b) J. B. Foresman, M. Head-Gordon, J. A. Pople, M. J. Frisch, *J. Phys. Chem.* 1992, **96**, 135–149.
- [7] M. J. Frisch, G. W. Trucks, H. B. Schlegel, G. E. Scuseria, M. A. Robb, J. R. Cheeseman, G. Scalmani, V. Barone, B. Mennucci, G. A. Petersson, H. Nakatsuji, M. Caricato, X. Li, H. P. Hratchian, A. F. Izmaylov, J. Bloino, G. Zheng, J. L. Sonnenberg, M. Hada, M. Ehara, K. Toyota, R. Fukuda, J. Hasegawa, M. Ishida, T. Nakajima, Y. Honda, O. Kitao, H. Nakai, T. Vreven, J. A. Montgomery, Jr., J. E. Peralta, F. Ogliaro, M. Bearpark, J. J. Heyd, E. Brothers, K. N. Kudin, V. N. Staroverov, R. Kobayashi, J. Normand, K. Raghavachari, A. Rendell, J. C. Burant, S. S. Iyengar, J. Tomasi, M. Cossi, N. Rega, J. M. Millam, M. Klene, J. E. Knox, J. B. Cross, V. Bakken, C. Adamo, J. Jaramillo, R. Gomperts, R. E. Stratmann, O. Yazyev, A. J. Austin, R. Cammi, C. Pomelli, J. W. Ochterski, R. L. Martin, K. Morokuma, V. G. Zakrzewski, G. A. Voth, P. Salvador, J. J. Dannenberg, S. Dapprich, A. D. Daniels, Ö. Farkas, J. B. Foresman, J. V. Ortiz, J. Cioslowski, D. J. Fox, Gaussian, Inc., Wallingford CT, Gaussian 09, Revision A.2.
- [8] (a) T. B. Adler, G. Knizia, H.-J. Werner, *J. Chem. Phys.* 2007, **127**, 221106. (b) G. Knizia, T. B. Adler, H.-J. Werner, *J. Chem. Phys.* 2009, **130**, 054104. (c) K. A. Peterson, T. B. Adler, H.-J. Werner, *J. Chem. Phys.* 2008, **128**, 084102.
- [9] M. Neff, G. Rauhut, *J. Chem. Phys.* 2009, **131**, 124129.
- [10] (a) V. J. Barone, *Chem. Phys.* 2005, **122**, 014108. (b) D. A. Clabo, W. D. Allen, R. B. Remington, Y. Yamaguchi, H. F. Schaefer III, *Chem. Phys.* 1988, **123**, 187–239.
- [11] H.-J. Werner, P. J. Knowles, G. Knizia, F. R. Manby, M. Schütz, *Wiley Interdiscip. Rev.: Comput. Mol. Sci.* 2012, **2**, 242–253.

Calculated atomic coordinates (in Angstroms) and energies (in Hartrees) of all optimized structures.

**O<sub>2</sub>PNCO**

B3LYP/6-311++G(3df, 3pd)

|   |             |             |             |
|---|-------------|-------------|-------------|
| P | -0.92183400 | 0.04884600  | 0.00000000  |
| O | -0.92391100 | 1.50398500  | 0.00000000  |
| O | -1.97327300 | -0.95125200 | -0.00000100 |
| N | 0.57300800  | -0.62777200 | 0.00000100  |
| C | 1.71887900  | -0.21625600 | 0.00000100  |
| O | 2.83508100  | 0.06717200  | -0.00000100 |

Zero-point correction= 0.022441 (Hartree/Particle)  
Thermal correction to Energy= 0.028105  
Thermal correction to Enthalpy= 0.029049  
Thermal correction to Gibbs Free Energy= -0.008065  
Sum of electronic and zero-point Energies= -660.070057  
Sum of electronic and Thermal Energies= -660.064393  
Sum of electronic and Thermal Enthalpies= -660.063449  
Sum of electronic and Thermal Free Energies= -660.100563

CCSD(T)-F12A/VTZ-F12 ENERGY=-659.24037289

|   |              |               |               |
|---|--------------|---------------|---------------|
| P | 0.0000000000 | -0.0565429039 | -0.8923706522 |
| O | 0.0000000000 | -1.5058404942 | -0.7806086369 |
| O | 0.0000000000 | 0.8589758502  | -2.0151748213 |
| N | 0.0000000000 | 0.7335903339  | 0.5481573044  |
| C | 0.0000000000 | 0.2559756414  | 1.6800893038  |
| O | 0.0000000000 | -0.0779208133 | 2.7834743961  |

**singlet O<sub>2</sub>PN**

B3LYP/6-311++G(3df, 3pd)

|   |             |             |             |
|---|-------------|-------------|-------------|
| P | -0.15174100 | 0.04378300  | -0.00011800 |
| N | 1.07397600  | 1.02290400  | 0.00007400  |
| O | 0.94229300  | -0.98817700 | 0.00005800  |
| O | -1.59750700 | 0.01104400  | 0.00009900  |

Zero-point correction= 0.010367 (Hartree/Particle)  
Thermal correction to Energy= 0.014421  
Thermal correction to Enthalpy= 0.015366  
Thermal correction to Gibbs Free Energy= -0.016363  
Sum of electronic and zero-point Energies= -546.541840  
Sum of electronic and Thermal Energies= -546.537785  
Sum of electronic and Thermal Enthalpies= -546.536841  
Sum of electronic and Thermal Free Energies= -546.568570

CCSD(T)-F12A/VTZ-F12 ENERGY=-545.86242934

|   |               |              |               |
|---|---------------|--------------|---------------|
| P | 0.0578213161  | 0.0000000000 | -0.1519183145 |
| N | 1.0063381473  | 0.0000000000 | 1.0954582067  |
| O | -1.0019879067 | 0.0000000000 | 0.9318878240  |
| O | 0.0089990691  | 0.0000000000 | -1.5967428647 |

**triplet O<sub>2</sub>PN**

B3LYP/6-311++G(3df, 3pd)

|   |            |             |             |
|---|------------|-------------|-------------|
| P | 0.00000000 | 0.00000000  | 0.07592800  |
| N | 0.00000000 | 0.00000000  | -1.62459200 |
| O | 0.00000000 | 1.34366900  | 0.63957700  |
| O | 0.00000000 | -1.34366900 | 0.63957700  |

Zero-point correction= 0.009925 (Hartree/Particle)  
 Thermal correction to Energy= 0.013988  
 Thermal correction to Enthalpy= 0.014932  
 Thermal correction to Gibbs Free Energy= -0.017321  
 Sum of electronic and zero-point Energies= -546.567427  
 Sum of electronic and Thermal Energies= -546.563364  
 Sum of electronic and Thermal Enthalpies= -546.562420  
 Sum of electronic and Thermal Free Energies= -546.594673

UCCSD(T)-F12A/VTZ-F12 ENERGY=-545.87781275  
 P 0.000000000 0.000000000 0.0809328977  
 N 0.000000000 -0.000000001 -1.6310764414  
 O 0.000000000 1.3439771652 0.6356172505  
 O 0.000000000 -1.3439771651 0.6356172507

**singlet *trans*-OPNO**

B3LYP/6-311++G(3df, 3pd)  
 P 0.00000000 0.76574000 0.00000000  
 O 1.43335700 1.11139100 0.00000000  
 N -0.37915100 -0.86161100 0.00000000  
 O -1.10160000 -1.79324400 0.00000000  
 Zero-point correction= 0.009946 (Hartree/Particle)  
 Thermal correction to Energy= 0.014405  
 Thermal correction to Enthalpy= 0.015349  
 Thermal correction to Gibbs Free Energy= -0.017365  
 Sum of electronic and zero-point Energies= -546.553080  
 Sum of electronic and Thermal Energies= -546.548621  
 Sum of electronic and Thermal Enthalpies= -546.547677  
 Sum of electronic and Thermal Free Energies= -546.580391

CCSD(T)-F12A/VTZ-F12 ENERGY=-545.85750647  
 P 0.000000000 -0.4326839085 0.6229131066  
 O 0.000000000 0.5445634938 1.7238193632  
 N 0.000000000 0.1963981005 -0.9311367338  
 O 0.000000000 0.1213778079 -2.1148930362

**triplet *trans*-OPNO**

B3LYP/6-311++G(3df, 3pd)  
 P 0.00000000 0.77951600 0.00000000  
 O 1.44562400 1.03369700 0.00000000  
 N -0.22150100 -1.00452200 0.00000000  
 O -1.25181100 -1.61633300 0.00000000  
 Zero-point correction= 0.009614 (Hartree/Particle)  
 Thermal correction to Energy= 0.014051  
 Thermal correction to Enthalpy= 0.014995  
 Thermal correction to Gibbs Free Energy= -0.018642  
 Sum of electronic and zero-point Energies= -546.573237  
 Sum of electronic and Thermal Energies= -546.568800  
 Sum of electronic and Thermal Enthalpies= -546.567856  
 Sum of electronic and Thermal Free Energies= -546.601493

UCCSD(T)-F12A/VTZ-F12 ENERGY=-545.86849525  
 P 0.000000000 -0.4629771050 0.5983667590  
 O 0.000000000 0.5170248466 1.6886958200

|   |             |               |               |
|---|-------------|---------------|---------------|
| N | 0.000000000 | 0.4474695551  | -0.9229730209 |
| O | 0.000000000 | -0.0122271182 | -2.0393831678 |

**singlet *cis*-OPNO**

B3LYP/6-311++G(3df, 3pd)

|   |             |             |            |
|---|-------------|-------------|------------|
| P | 0.00000000  | 0.99077000  | 0.00000000 |
| O | 1.37951700  | 0.48156600  | 0.00000000 |
| N | -1.12492300 | -0.75530900 | 0.00000000 |
| O | -0.39520900 | -1.67836400 | 0.00000000 |

Zero-point correction= 0.009280 (Hartree/Particle)  
 Thermal correction to Energy= 0.014113  
 Thermal correction to Enthalpy= 0.015058  
 Thermal correction to Gibbs Free Energy= -0.019138  
 Sum of electronic and zero-point Energies= -546.548466  
 Sum of electronic and Thermal Energies= -546.543632  
 Sum of electronic and Thermal Enthalpies= -546.542688  
 Sum of electronic and Thermal Free Energies= -546.576883

**triplet *cis*-OPNO**

B3LYP/6-311++G(3df, 3pd)

|   |             |             |             |
|---|-------------|-------------|-------------|
| P | 0.76782200  | -0.49964400 | -0.00024700 |
| O | 1.27113100  | 0.88216700  | 0.00024500  |
| N | -1.05066800 | -0.46914700 | 0.00067100  |
| O | -1.79146200 | 0.46516900  | -0.00036900 |

Zero-point correction= 0.009575 (Hartree/Particle)  
 Thermal correction to Energy= 0.014021  
 Thermal correction to Enthalpy= 0.014966  
 Thermal correction to Gibbs Free Energy= -0.018850  
 Sum of electronic and zero-point Energies= -546.572432  
 Sum of electronic and Thermal Energies= -546.567986  
 Sum of electronic and Thermal Enthalpies= -546.567042  
 Sum of electronic and Thermal Free Energies= -546.600857

**TS1**

B3LYP/6-311++G(3df, 3pd)

|   |             |             |             |
|---|-------------|-------------|-------------|
| O | 2.19995000  | -0.48878400 | -0.00057600 |
| P | 0.95597300  | 0.26584600  | 0.00017200  |
| N | -0.01782500 | 1.41139200  | 0.00023000  |
| O | -0.47818700 | -1.11791400 | 0.00054700  |
| C | -1.37595900 | -0.27674100 | 0.00000300  |
| O | -2.46664500 | 0.08082400  | -0.00049800 |

Zero-point correction= 0.019610 (Hartree/Particle)  
 Thermal correction to Energy= 0.025130  
 Thermal correction to Enthalpy= 0.026075  
 Thermal correction to Gibbs Free Energy= -0.010166  
 Sum of electronic and zero-point Energies= -659.946132  
 Sum of electronic and Thermal Energies= -659.940612  
 Sum of electronic and Thermal Enthalpies= -659.939668  
 Sum of electronic and Thermal Free Energies= -659.975908

**TS2**

B3LYP/6-311++G(3df, 3pd)

|   |            |            |            |
|---|------------|------------|------------|
| O | 0.62893100 | 0.15858400 | 0.64772800 |
| N | 0.73521300 | 1.35667500 | 3.24490900 |

|                                              |                             |             |            |
|----------------------------------------------|-----------------------------|-------------|------------|
| C                                            | 2.35828600                  | -1.84628700 | 3.21876900 |
| O                                            | 3.02271600                  | -2.67709300 | 3.58019300 |
| P                                            | 0.21967900                  | 0.83349500  | 1.85937700 |
| O                                            | -1.06730200                 | 1.43336000  | 2.35846100 |
| Zero-point correction=                       | 0.015880 (Hartree/Particle) |             |            |
| Thermal correction to Energy=                | 0.023290                    |             |            |
| Thermal correction to Enthalpy=              | 0.024234                    |             |            |
| Thermal correction to Gibbs Free Energy=     | -0.019875                   |             |            |
| Sum of electronic and zero-point Energies=   | -659.894003                 |             |            |
| Sum of electronic and Thermal Energies=      | -659.886593                 |             |            |
| Sum of electronic and Thermal Enthalpies=    | -659.885649                 |             |            |
| Sum of electronic and Thermal Free Energies= | -659.929758                 |             |            |

### TS3

B3LYP/6-311++G(3df, 3pd)

|                                              |                             |             |             |
|----------------------------------------------|-----------------------------|-------------|-------------|
| P                                            | 0.27542500                  | 0.11229400  | 0.29692900  |
| N                                            | -1.12401100                 | 0.73391200  | -0.22874700 |
| O                                            | 1.60523000                  | -0.11179800 | -0.28583900 |
| O                                            | -1.13814200                 | -0.74092600 | -0.07074900 |
| Zero-point correction=                       | 0.008545 (Hartree/Particle) |             |             |
| Thermal correction to Energy=                | 0.012267                    |             |             |
| Thermal correction to Enthalpy=              | 0.013212                    |             |             |
| Thermal correction to Gibbs Free Energy=     | -0.017886                   |             |             |
| Sum of electronic and zero-point Energies=   | -546.492774                 |             |             |
| Sum of electronic and Thermal Energies=      | -546.489052                 |             |             |
| Sum of electronic and Thermal Enthalpies=    | -546.488108                 |             |             |
| Sum of electronic and Thermal Free Energies= | -546.519205                 |             |             |

### C<sub>2</sub>H<sub>4</sub>O<sub>2</sub>PNCO

B3LYP/6-311++G(3df, 3pd)

|                                              |                             |             |             |
|----------------------------------------------|-----------------------------|-------------|-------------|
| C                                            | -1.76699300                 | -0.89877400 | 0.67045300  |
| H                                            | -2.69646500                 | -1.46109200 | 0.63477800  |
| H                                            | -1.14388000                 | -1.27041900 | 1.48382000  |
| C                                            | -1.99576000                 | 0.61844000  | 0.77402400  |
| H                                            | -2.98917100                 | 0.90845100  | 0.43468700  |
| H                                            | -1.83416900                 | 0.98636500  | 1.78545400  |
| O                                            | -1.08069900                 | -1.10475600 | -0.57879400 |
| O                                            | -1.03925200                 | 1.24004200  | -0.10885300 |
| P                                            | -0.12334900                 | 0.16794900  | -0.93046200 |
| N                                            | 1.13900000                  | -0.09368300 | 0.23740500  |
| O                                            | 3.50289000                  | -0.01886300 | 0.38936900  |
| C                                            | 2.34232100                  | -0.04602400 | 0.27928800  |
| Zero-point correction=                       | 0.079944 (Hartree/Particle) |             |             |
| Thermal correction to Energy=                | 0.087660                    |             |             |
| Thermal correction to Enthalpy=              | 0.088604                    |             |             |
| Thermal correction to Gibbs Free Energy=     | 0.045888                    |             |             |
| Sum of electronic and zero-point Energies=   | -738.655874                 |             |             |
| Sum of electronic and Thermal Energies=      | -738.648159                 |             |             |
| Sum of electronic and Thermal Enthalpies=    | -738.647215                 |             |             |
| Sum of electronic and Thermal Free Energies= | -738.689931                 |             |             |

### C<sub>2</sub>H<sub>4</sub>O<sub>2</sub>PN<sub>3</sub>

B3LYP/6-311++G(3df, 3pd)

|   |             |             |            |
|---|-------------|-------------|------------|
| C | -1.82740300 | -0.89294100 | 0.56367200 |
|---|-------------|-------------|------------|



|                                              |             |             |                    |
|----------------------------------------------|-------------|-------------|--------------------|
| H                                            | -2.73747200 | -1.46962500 | 0.42002300         |
| H                                            | -1.30866600 | -1.23911900 | 1.45752800         |
| C                                            | -2.08382500 | 0.62048400  | 0.60182100         |
| H                                            | -3.01221200 | 0.89261500  | 0.10090500         |
| H                                            | -2.09003400 | 1.00877100  | 1.61832000         |
| O                                            | -0.98234300 | -1.11071000 | -0.58264300        |
| O                                            | -1.00058400 | 1.23562000  | -0.12447600        |
| P                                            | 0.00582100  | 0.16309700  | -0.83070700        |
| N                                            | 1.12510300  | -0.08586500 | 0.52069200         |
| N                                            | 2.33207300  | -0.04258200 | 0.32724700         |
| N                                            | 3.45594400  | -0.01492900 | 0.22746400         |
| Zero-point correction=                       |             | 0.079526    | (Hartree/Particle) |
| Thermal correction to Energy=                |             | 0.087248    |                    |
| Thermal correction to Enthalpy=              |             | 0.088193    |                    |
| Thermal correction to Gibbs Free Energy=     |             | 0.045408    |                    |
| Sum of electronic and zero-point Energies=   |             | -734.751626 |                    |
| Sum of electronic and Thermal Energies=      |             | -734.743904 |                    |
| Sum of electronic and Thermal Enthalpies=    |             | -734.742960 |                    |
| Sum of electronic and Thermal Free Energies= |             | -734.785744 |                    |

#### singlet C<sub>2</sub>H<sub>4</sub>O<sub>2</sub>PN

B3LYP/6-311++G(3df, 3pd)

|                                              |             |             |                    |
|----------------------------------------------|-------------|-------------|--------------------|
| C                                            | 1.54668500  | 0.75427300  | 0.13902300         |
| H                                            | 2.21317100  | 1.30196700  | -0.52182600        |
| H                                            | 1.78967300  | 0.97893000  | 1.17749300         |
| C                                            | 1.54680800  | -0.75408300 | -0.13894700        |
| H                                            | 1.78986500  | -0.97858500 | -1.17744200        |
| H                                            | 2.21333700  | -1.30176500 | 0.52186100         |
| O                                            | 0.20028300  | 1.19623500  | -0.11513300        |
| O                                            | 0.20046300  | -1.19630000 | 0.11516700         |
| P                                            | -0.88161000 | -0.00012500 | -0.00012600        |
| N                                            | -2.36411800 | 0.00010200  | 0.00015300         |
| Zero-point correction=                       |             | 0.070040    | (Hartree/Particle) |
| Thermal correction to Energy=                |             | 0.075738    |                    |
| Thermal correction to Enthalpy=              |             | 0.076682    |                    |
| Thermal correction to Gibbs Free Energy=     |             | 0.040394    |                    |
| Sum of electronic and zero-point Energies=   |             | -625.189175 |                    |
| Sum of electronic and Thermal Energies=      |             | -625.183477 |                    |
| Sum of electronic and Thermal Enthalpies=    |             | -625.182533 |                    |
| Sum of electronic and Thermal Free Energies= |             | -625.218820 |                    |

#### triplet C<sub>2</sub>H<sub>4</sub>O<sub>2</sub>PN

B3LYP/6-311++G(3df, 3pd)

|                        |             |             |                    |
|------------------------|-------------|-------------|--------------------|
| C                      | 1.24989800  | 0.84090900  | 0.32821100         |
| H                      | 2.10669300  | 1.39454000  | -0.04758500        |
| H                      | 1.02947100  | 1.15205200  | 1.34943500         |
| C                      | 1.44454600  | -0.68376800 | 0.22947800         |
| H                      | 2.19625900  | -0.95100900 | -0.51180000        |
| H                      | 1.70637600  | -1.12106300 | 1.19116600         |
| O                      | 0.12392300  | 1.15773200  | -0.51460100        |
| O                      | 0.19219300  | -1.24515900 | -0.21792200        |
| P                      | -0.94566800 | -0.08708800 | -0.46607800        |
| N                      | -1.64990900 | 0.08405300  | 1.07485700         |
| Zero-point correction= |             | 0.067697    | (Hartree/Particle) |

|                                              |             |
|----------------------------------------------|-------------|
| Thermal correction to Energy=                | 0.073694    |
| Thermal correction to Enthalpy=              | 0.074638    |
| Thermal correction to Gibbs Free Energy=     | 0.036573    |
| Sum of electronic and zero-point Energies=   | -625.153145 |
| Sum of electronic and Thermal Energies=      | -625.147149 |
| Sum of electronic and Thermal Enthalpies=    | -625.146205 |
| Sum of electronic and Thermal Free Energies= | -625.184269 |

### **(O=)PCON(=O)**

B3LYP/6-311++G(3df, 3pd)

|                                              |                             |             |             |
|----------------------------------------------|-----------------------------|-------------|-------------|
| C                                            | -1.08905900                 | -0.17040200 | 0.00000300  |
| O                                            | -0.11243100                 | -1.17421700 | 0.00021700  |
| O                                            | 2.11755500                  | -0.56585600 | -0.00014300 |
| O                                            | -2.25189700                 | -0.37324400 | -0.00015000 |
| P                                            | 0.09744700                  | 1.27261200  | 0.00004800  |
| N                                            | 1.00669000                  | -0.16574800 | -0.00001900 |
| Zero-point correction=                       | 0.021256 (Hartree/Particle) |             |             |
| Thermal correction to Energy=                | 0.026332                    |             |             |
| Thermal correction to Enthalpy=              | 0.027277                    |             |             |
| Thermal correction to Gibbs Free Energy=     | -0.007799                   |             |             |
| Sum of electronic and zero-point Energies=   | -659.880815                 |             |             |
| Sum of electronic and Thermal Energies=      | -659.875739                 |             |             |
| Sum of electronic and Thermal Enthalpies=    | -659.874795                 |             |             |
| Sum of electronic and Thermal Free Energies= | -659.909871                 |             |             |

### **cyclic-ONPOC(=O)**

B3LYP/6-311++G(3df, 3pd)

|                                              |                             |             |             |
|----------------------------------------------|-----------------------------|-------------|-------------|
| P                                            | 1.44107100                  | -0.40883400 | 0.00058700  |
| N                                            | 0.94661000                  | 1.10717200  | -0.00024100 |
| O                                            | -0.44509000                 | 1.16014600  | -0.00036100 |
| O                                            | -0.08486600                 | -1.05428700 | -0.00122500 |
| C                                            | -1.04662700                 | -0.07754300 | -0.00012400 |
| O                                            | -2.21536600                 | -0.24991300 | 0.00078900  |
| Zero-point correction=                       | 0.022362 (Hartree/Particle) |             |             |
| Thermal correction to Energy=                | 0.026889                    |             |             |
| Thermal correction to Enthalpy=              | 0.027833                    |             |             |
| Thermal correction to Gibbs Free Energy=     | -0.006134                   |             |             |
| Sum of electronic and zero-point Energies=   | -659.970200                 |             |             |
| Sum of electronic and Thermal Energies=      | -659.965673                 |             |             |
| Sum of electronic and Thermal Enthalpies=    | -659.964729                 |             |             |
| Sum of electronic and Thermal Free Energies= | -659.998696                 |             |             |

### **O<sub>2</sub>PCNO**

B3LYP/6-311++G(3df, 3pd)

|                                          |                             |             |            |
|------------------------------------------|-----------------------------|-------------|------------|
| P                                        | -0.00006900                 | -1.03826900 | 0.00000000 |
| O                                        | -1.33979100                 | -1.60121000 | 0.00000000 |
| O                                        | 1.33960800                  | -1.60132000 | 0.00000000 |
| C                                        | 0.00000000                  | 0.67888200  | 0.00000000 |
| N                                        | 0.00008100                  | 1.84452800  | 0.00000000 |
| O                                        | 0.00024200                  | 3.02616200  | 0.00000000 |
| Zero-point correction=                   | 0.021660 (Hartree/Particle) |             |            |
| Thermal correction to Energy=            | 0.027567                    |             |            |
| Thermal correction to Enthalpy=          | 0.028511                    |             |            |
| Thermal correction to Gibbs Free Energy= | -0.009249                   |             |            |

Sum of electronic and zero-point Energies= -659.954008  
 Sum of electronic and Thermal Energies= -659.948101  
 Sum of electronic and Thermal Enthalpies= -659.947157  
 Sum of electronic and Thermal Free Energies= -659.984917

### O<sub>2</sub>POCN

B3LYP/6-311++G(3df, 3pd)

|                                              |                             |             |            |
|----------------------------------------------|-----------------------------|-------------|------------|
| P                                            | 0.85873300                  | 0.09492100  | 0.00000000 |
| O                                            | 0.62006100                  | 1.52313300  | 0.00000000 |
| O                                            | 1.99627000                  | -0.79787800 | 0.00000000 |
| C                                            | -1.70331900                 | -0.27326800 | 0.00000000 |
| O                                            | -0.50756800                 | -0.78941200 | 0.00000000 |
| N                                            | -2.79017000                 | 0.10414900  | 0.00000000 |
| Zero-point correction=                       | 0.021383 (Hartree/Particle) |             |            |
| Thermal correction to Energy=                | 0.027126                    |             |            |
| Thermal correction to Enthalpy=              | 0.028070                    |             |            |
| Thermal correction to Gibbs Free Energy=     | -0.008746                   |             |            |
| Sum of electronic and zero-point Energies=   | -660.013987                 |             |            |
| Sum of electronic and Thermal Energies=      | -660.008244                 |             |            |
| Sum of electronic and Thermal Enthalpies=    | -660.007300                 |             |            |
| Sum of electronic and Thermal Free Energies= | -660.044116                 |             |            |

### O<sub>2</sub>NCPO

B3LYP/6-311++G(3df, 3pd)

|                                              |                             |             |            |
|----------------------------------------------|-----------------------------|-------------|------------|
| O                                            | -1.60616100                 | 1.70610100  | 0.00000000 |
| O                                            | -2.15918500                 | -0.41890100 | 0.00000000 |
| C                                            | 0.00000000                  | 0.36092500  | 0.00000000 |
| O                                            | 2.67095200                  | -0.55582600 | 0.00000000 |
| N                                            | -1.35361600                 | 0.48811400  | 0.00000000 |
| P                                            | 1.21536500                  | -0.76222200 | 0.00000000 |
| Zero-point correction=                       | 0.019101 (Hartree/Particle) |             |            |
| Thermal correction to Energy=                | 0.025217                    |             |            |
| Thermal correction to Enthalpy=              | 0.026161                    |             |            |
| Thermal correction to Gibbs Free Energy=     | -0.011784                   |             |            |
| Sum of electronic and zero-point Energies=   | -659.789842                 |             |            |
| Sum of electronic and Thermal Energies=      | -659.783726                 |             |            |
| Sum of electronic and Thermal Enthalpies=    | -659.782782                 |             |            |
| Sum of electronic and Thermal Free Energies= | -659.820727                 |             |            |

### O<sub>2</sub>NOCP

B3LYP/6-311++G(3df, 3pd)

|                                            |                             |             |             |
|--------------------------------------------|-----------------------------|-------------|-------------|
| O                                          | 1.06219200                  | 1.26471400  | 0.00000200  |
| O                                          | 2.58500100                  | -0.31718600 | -0.00000200 |
| C                                          | -0.96097200                 | -0.56641600 | 0.00000300  |
| O                                          | 0.10556300                  | -1.14057000 | 0.00000100  |
| N                                          | 1.52402500                  | 0.18609000  | 0.00000000  |
| P                                          | -2.32829300                 | 0.24268000  | -0.00000100 |
| Zero-point correction=                     | 0.019868 (Hartree/Particle) |             |             |
| Thermal correction to Energy=              | 0.026042                    |             |             |
| Thermal correction to Enthalpy=            | 0.026986                    |             |             |
| Thermal correction to Gibbs Free Energy=   | -0.011332                   |             |             |
| Sum of electronic and zero-point Energies= | -659.817690                 |             |             |
| Sum of electronic and Thermal Energies=    | -659.811515                 |             |             |
| Sum of electronic and Thermal Enthalpies=  | -659.810571                 |             |             |

Sum of electronic and Thermal Free Energies= -659.848889

### **O<sub>2</sub>NPCO**

B3LYP/6-311++G(3df, 3pd)

|                                              |             |                             |            |
|----------------------------------------------|-------------|-----------------------------|------------|
| O                                            | 0.69540700  | 1.44403100                  | 0.00000000 |
| O                                            | 2.21030100  | -0.10626100                 | 0.00000000 |
| C                                            | -1.48193900 | -0.05366700                 | 0.00000000 |
| N                                            | 1.05631700  | 0.28139000                  | 0.00000000 |
| P                                            | -0.15419100 | -1.13440500                 | 0.00000000 |
| O                                            | -2.42942400 | 0.58327300                  | 0.00000000 |
| Zero-point correction=                       |             | 0.020413 (Hartree/Particle) |            |
| Thermal correction to Energy=                |             | 0.026320                    |            |
| Thermal correction to Enthalpy=              |             | 0.027264                    |            |
| Thermal correction to Gibbs Free Energy=     |             | -0.010231                   |            |
| Sum of electronic and zero-point Energies=   |             | -659.883863                 |            |
| Sum of electronic and Thermal Energies=      |             | -659.877955                 |            |
| Sum of electronic and Thermal Enthalpies=    |             | -659.877011                 |            |
| Sum of electronic and Thermal Free Energies= |             | -659.914506                 |            |

### **(OP)C(O)(NO)**

B3LYP/6-311++G(3df, 3pd)

|                                              |             |                             |             |
|----------------------------------------------|-------------|-----------------------------|-------------|
| C                                            | -0.67119000 | -0.62946400                 | -0.02304100 |
| O                                            | -1.06471700 | -1.73918100                 | 0.04398900  |
| P                                            | 1.13557800  | 0.03074800                  | -0.51893200 |
| N                                            | -1.61047200 | 0.59248200                  | 0.25122300  |
| O                                            | 1.82904100  | 0.07292900                  | 0.78533800  |
| O                                            | -0.98097700 | 1.56227600                  | -0.05886900 |
| Zero-point correction=                       |             | 0.018385 (Hartree/Particle) |             |
| Thermal correction to Energy=                |             | 0.025109                    |             |
| Thermal correction to Enthalpy=              |             | 0.026053                    |             |
| Thermal correction to Gibbs Free Energy=     |             | -0.013531                   |             |
| Sum of electronic and zero-point Energies=   |             | -659.888129                 |             |
| Sum of electronic and Thermal Energies=      |             | -659.881405                 |             |
| Sum of electronic and Thermal Enthalpies=    |             | -659.880460                 |             |
| Sum of electronic and Thermal Free Energies= |             | -659.920045                 |             |

### **cyclic-O<sub>2</sub>P(=N)**

B3LYP/6-311++G(3df, 3pd)

|                                              |            |                             |             |
|----------------------------------------------|------------|-----------------------------|-------------|
| P                                            | 0.00000000 | 0.00000000                  | 0.30355500  |
| O                                            | 0.00000000 | -0.81108400                 | -1.06495000 |
| O                                            | 0.00000000 | 0.81108400                  | -1.06495000 |
| N                                            | 0.00000000 | 0.00000000                  | 1.78369800  |
| Zero-point correction=                       |            | 0.009650 (Hartree/Particle) |             |
| Thermal correction to Energy=                |            | 0.013762                    |             |
| Thermal correction to Enthalpy=              |            | 0.014706                    |             |
| Thermal correction to Gibbs Free Energy=     |            | -0.016398                   |             |
| Sum of electronic and zero-point Energies=   |            | -546.467925                 |             |
| Sum of electronic and Thermal Energies=      |            | -546.463812                 |             |
| Sum of electronic and Thermal Enthalpies=    |            | -546.462868                 |             |
| Sum of electronic and Thermal Free Energies= |            | -546.493972                 |             |

### **cyclic-OOPN**

B3LYP/6-311++G(3df, 3pd)

|   |             |             |             |
|---|-------------|-------------|-------------|
| P | -0.96043600 | -0.01216100 | -0.00005300 |
|---|-------------|-------------|-------------|

|                                              |                             |             |             |
|----------------------------------------------|-----------------------------|-------------|-------------|
| O                                            | 0.37745500                  | -1.05151300 | 0.00011300  |
| N                                            | 0.23106300                  | 1.08147000  | 0.00014200  |
| O                                            | 1.22118300                  | 0.12802800  | -0.00013700 |
| Zero-point correction=                       | 0.010923 (Hartree/Particle) |             |             |
| Thermal correction to Energy=                | 0.014353                    |             |             |
| Thermal correction to Enthalpy=              | 0.015297                    |             |             |
| Thermal correction to Gibbs Free Energy=     | -0.015193                   |             |             |
| Sum of electronic and zero-point Energies=   | -546.479601                 |             |             |
| Sum of electronic and Thermal Energies=      | -546.476172                 |             |             |
| Sum of electronic and Thermal Enthalpies=    | -546.475227                 |             |             |
| Sum of electronic and Thermal Free Energies= | -546.505717                 |             |             |

### **(O=)PN(=O)**

B3LYP/6-311++G(3df, 3pd)

|                                              |                             |             |             |
|----------------------------------------------|-----------------------------|-------------|-------------|
| P                                            | -0.19585200                 | 0.75010800  | 0.00000000  |
| O                                            | -0.19585200                 | -0.46795100 | -1.11650400 |
| N                                            | 0.86734300                  | -0.53777300 | 0.00000000  |
| O                                            | -0.19585200                 | -0.46795100 | 1.11650400  |
| Zero-point correction=                       | 0.009335 (Hartree/Particle) |             |             |
| Thermal correction to Energy=                | 0.013242                    |             |             |
| Thermal correction to Enthalpy=              | 0.014186                    |             |             |
| Thermal correction to Gibbs Free Energy=     | -0.017114                   |             |             |
| Sum of electronic and zero-point Energies=   | -546.506435                 |             |             |
| Sum of electronic and Thermal Energies=      | -546.502528                 |             |             |
| Sum of electronic and Thermal Enthalpies=    | -546.501584                 |             |             |
| Sum of electronic and Thermal Free Energies= | -546.532884                 |             |             |

### **triplet cyclic-ONP(=O)**

B3LYP/6-311++G(3df, 3pd)

|                                              |                             |             |             |
|----------------------------------------------|-----------------------------|-------------|-------------|
| P                                            | 0.29354400                  | 0.11292100  | 0.36230300  |
| O                                            | 1.56351600                  | -0.07346400 | -0.36387200 |
| O                                            | -1.05482900                 | -0.73698800 | -0.07909000 |
| N                                            | -1.21038000                 | 0.68425800  | -0.27012200 |
| Zero-point correction=                       | 0.009113 (Hartree/Particle) |             |             |
| Thermal correction to Energy=                | 0.013199                    |             |             |
| Thermal correction to Enthalpy=              | 0.014143                    |             |             |
| Thermal correction to Gibbs Free Energy=     | -0.018585                   |             |             |
| Sum of electronic and zero-point Energies=   | -546.523389                 |             |             |
| Sum of electronic and Thermal Energies=      | -546.519303                 |             |             |
| Sum of electronic and Thermal Enthalpies=    | -546.518359                 |             |             |
| Sum of electronic and Thermal Free Energies= | -546.551087                 |             |             |

### **singlet O<sub>2</sub>NP**

B3LYP/6-311++G(3df, 3pd)

|                                            |                             |             |             |
|--------------------------------------------|-----------------------------|-------------|-------------|
| O                                          | 0.00000000                  | 1.09701200  | -0.99422300 |
| O                                          | 0.00000000                  | -1.09701200 | -0.99422300 |
| N                                          | 0.00000000                  | 0.00000000  | -0.42598300 |
| P                                          | 0.00000000                  | 0.00000000  | 1.25929700  |
| Zero-point correction=                     | 0.010636 (Hartree/Particle) |             |             |
| Thermal correction to Energy=              | 0.013934                    |             |             |
| Thermal correction to Enthalpy=            | 0.014878                    |             |             |
| Thermal correction to Gibbs Free Energy=   | -0.015184                   |             |             |
| Sum of electronic and zero-point Energies= | -546.461134                 |             |             |
| Sum of electronic and Thermal Energies=    | -546.457836                 |             |             |

Sum of electronic and Thermal Enthalpies= -546.456892  
Sum of electronic and Thermal Free Energies= -546.486954

**triplet O<sub>2</sub>NP**

B3LYP/6-311++G(3df, 3pd)

|   |            |             |             |
|---|------------|-------------|-------------|
| O | 0.00000000 | 1.08667800  | -1.04500500 |
| O | 0.00000000 | -1.08667800 | -1.04500500 |
| N | 0.00000000 | 0.00000000  | -0.48868600 |
| P | 0.00000000 | 0.00000000  | 1.34272600  |

Zero-point correction= 0.011116 (Hartree/Particle)  
Thermal correction to Energy= 0.015044  
Thermal correction to Enthalpy= 0.015989  
Thermal correction to Gibbs Free Energy= -0.016280  
Sum of electronic and zero-point Energies= -546.480778  
Sum of electronic and Thermal Energies= -546.476850  
Sum of electronic and Thermal Enthalpies= -546.475906  
Sum of electronic and Thermal Free Energies= -546.508174

**cyclic-O<sub>2</sub>N(≡P)**

B3LYP/6-311++G(3df, 3pd)

|   |            |             |             |
|---|------------|-------------|-------------|
| O | 0.00000000 | 0.75245900  | -1.30426400 |
| O | 0.00000000 | -0.75245900 | -1.30426400 |
| N | 0.00000000 | 0.00000000  | -0.10560200 |
| P | 0.00000000 | 0.00000000  | 1.44049600  |

Zero-point correction= 0.008209 (Hartree/Particle)  
Thermal correction to Energy= 0.011915  
Thermal correction to Enthalpy= 0.012859  
Thermal correction to Gibbs Free Energy= -0.017715  
Sum of electronic and zero-point Energies= -546.371962  
Sum of electronic and Thermal Energies= -546.368257  
Sum of electronic and Thermal Enthalpies= -546.367312  
Sum of electronic and Thermal Free Energies= -546.397886

**triplet cis-OPON**

B3LYP/6-311++G(3df, 3pd)

|   |             |             |             |
|---|-------------|-------------|-------------|
| P | -0.70527500 | -0.48778300 | 0.00001600  |
| O | -1.24443700 | 0.86953100  | -0.00001500 |
| O | 1.00861600  | -0.46204400 | -0.00003400 |
| N | 1.78081200  | 0.57955100  | 0.00002300  |

Zero-point correction= 0.008689 (Hartree/Particle)  
Thermal correction to Energy= 0.013088  
Thermal correction to Enthalpy= 0.014033  
Thermal correction to Gibbs Free Energy= -0.019655  
Sum of electronic and zero-point Energies= -546.554201  
Sum of electronic and Thermal Energies= -546.549802  
Sum of electronic and Thermal Enthalpies= -546.548858  
Sum of electronic and Thermal Free Energies= -546.582545

**triplet trans-OPON**

B3LYP/6-311++G(3df, 3pd)

|   |             |             |             |
|---|-------------|-------------|-------------|
| P | -0.55796600 | -0.47628200 | 0.00004500  |
| O | -1.65654600 | 0.48371900  | -0.00012200 |
| O | 0.88449900  | 0.45875300  | 0.00019600  |
| N | 2.07798200  | -0.05650700 | -0.00018000 |

Zero-point correction= 0.008616 (Hartree/Particle)  
 Thermal correction to Energy= 0.013126  
 Thermal correction to Enthalpy= 0.014070  
 Thermal correction to Gibbs Free Energy= -0.019739  
 Sum of electronic and zero-point Energies= -546.552416  
 Sum of electronic and Thermal Energies= -546.547905  
 Sum of electronic and Thermal Enthalpies= -546.546961  
 Sum of electronic and Thermal Free Energies= -546.580770

### CO

B3LYP/6-311++G(3df, 3pd)  
 O 0.00000000 0.00000000 0.48191000  
 C 0.00000000 0.00000000 -0.64254600  
 Zero-point correction= 0.005050 (Hartree/Particle)  
 Thermal correction to Energy= 0.007411  
 Thermal correction to Enthalpy= 0.008355  
 Thermal correction to Gibbs Free Energy= -0.014066  
 Sum of electronic and zero-point Energies= -113.351743  
 Sum of electronic and Thermal Energies= -113.349382  
 Sum of electronic and Thermal Enthalpies= -113.348438  
 Sum of electronic and Thermal Free Energies= -113.370858

### CO<sub>2</sub>

B3LYP/6-311++G(3df, 3pd)  
 C 0.00000000 0.00000000 0.00000000  
 O 0.00000000 0.00000000 1.15901700  
 O 0.00000000 0.00000000 -1.15901700  
 Zero-point correction= 0.011723 (Hartree/Particle)  
 Thermal correction to Energy= 0.014335  
 Thermal correction to Enthalpy= 0.015279  
 Thermal correction to Gibbs Free Energy= -0.008964  
 Sum of electronic and zero-point Energies= -188.648677  
 Sum of electronic and Thermal Energies= -188.646065  
 Sum of electronic and Thermal Enthalpies= -188.645121  
 Sum of electronic and Thermal Free Energies= -188.669364

### NO

B3LYP/6-311++G(3df, 3pd)  
 N 0.00000000 0.00000000 -0.61047300  
 O 0.00000000 0.00000000 0.53416400  
 Zero-point correction= 0.004509 (Hartree/Particle)  
 Thermal correction to Energy= 0.006870  
 Thermal correction to Enthalpy= 0.007814  
 Thermal correction to Gibbs Free Energy= -0.015473  
 Sum of electronic and zero-point Energies= -129.935394  
 Sum of electronic and Thermal Energies= -129.933032  
 Sum of electronic and Thermal Enthalpies= -129.932088  
 Sum of electronic and Thermal Free Energies= -129.955376

### O<sub>2</sub>

B3LYP/6-311++G(3df, 3pd)  
 O 0.00000000 0.00000000 0.60164900  
 O 0.00000000 0.00000000 -0.60164900  
 Zero-point correction= 0.003748 (Hartree/Particle)

Thermal correction to Energy= 0.006111  
 Thermal correction to Enthalpy= 0.007055  
 Thermal correction to Gibbs Free Energy= -0.016214  
 Sum of electronic and zero-point Energies= -150.375741  
 Sum of electronic and Thermal Energies= -150.373378  
 Sum of electronic and Thermal Enthalpies= -150.372433  
 Sum of electronic and Thermal Free Energies= -150.395702

#### OPN

B3LYP/6-311++G(3df, 3pd)  
 O 0.00000000 0.00000000 1.42028000  
 P 0.00000000 0.00000000 -0.04334900  
 N 0.00000000 0.00000000 -1.53028700  
 Zero-point correction= 0.007017 (Hartree/Particle)  
 Thermal correction to Energy= 0.010371  
 Thermal correction to Enthalpy= 0.011316  
 Thermal correction to Gibbs Free Energy= -0.015766  
 Sum of electronic and zero-point Energies= -471.328161  
 Sum of electronic and Thermal Energies= -471.324807  
 Sum of electronic and Thermal Enthalpies= -471.323862  
 Sum of electronic and Thermal Free Energies= -471.350944

#### PN

B3LYP/6-311++G(3df, 3pd)  
 P 0.00000000 0.00000000 0.47127600  
 N 0.00000000 0.00000000 -1.00987800  
 Zero-point correction= 0.003207 (Hartree/Particle)  
 Thermal correction to Energy= 0.005575  
 Thermal correction to Enthalpy= 0.006519  
 Thermal correction to Gibbs Free Energy= -0.017423  
 Sum of electronic and zero-point Energies= -396.113491  
 Sum of electronic and Thermal Energies= -396.111123  
 Sum of electronic and Thermal Enthalpies= -396.110179  
 Sum of electronic and Thermal Free Energies= -396.134121

#### PO

B3LYP/6-311++G(3df, 3pd)  
 P 0.00000000 0.00000000 0.51391600  
 O 0.00000000 0.00000000 -0.96359300  
 Zero-point correction= 0.002866 (Hartree/Particle)  
 Thermal correction to Energy= 0.005240  
 Thermal correction to Enthalpy= 0.006184  
 Thermal correction to Gibbs Free Energy= -0.018562  
 Sum of electronic and zero-point Energies= -416.600583  
 Sum of electronic and Thermal Energies= -416.598209  
 Sum of electronic and Thermal Enthalpies= -416.597265  
 Sum of electronic and Thermal Free Energies= -416.622010

#### HNCO

B3LYP/6-311++G(3df, 3pd)  
 C 0.00000000 0.04967600 0.00000000  
 N -0.38576100 -1.09744000 0.00000000  
 H -1.34673500 -1.39123300 0.00000000  
 O 0.50588300 1.09690800 0.00000000



Zero-point correction= 0.021332 (Hartree/Particle)  
 Thermal correction to Energy= 0.024567  
 Thermal correction to Enthalpy= 0.025512  
 Thermal correction to Gibbs Free Energy= -0.001546  
 Sum of electronic and zero-point Energies= -168.730499  
 Sum of electronic and Thermal Energies= -168.727263  
 Sum of electronic and Thermal Enthalpies= -168.726319  
 Sum of electronic and Thermal Free Energies= -168.753377

### HOCN

B3LYP/6-311++G(3df, 3pd)

C 0.18051500 -0.00282400 0.00000000  
 O -1.11046300 -0.11033800 0.00000000  
 H -1.53309000 0.75937300 0.00000000  
 N 1.33338700 0.02003900 0.00000000  
 Zero-point correction= 0.021555 (Hartree/Particle)  
 Thermal correction to Energy= 0.024891  
 Thermal correction to Enthalpy= 0.025835  
 Thermal correction to Gibbs Free Energy= -0.001557  
 Sum of electronic and zero-point Energies= -168.684713  
 Sum of electronic and Thermal Energies= -168.681376  
 Sum of electronic and Thermal Enthalpies= -168.680432  
 Sum of electronic and Thermal Free Energies= -168.707824

### HCNO

B3LYP/6-311++G(3df, 3pd)

H 0.00000000 0.00000000 2.23509200  
 N 0.00000000 0.00000000 0.02051500  
 O 0.00000000 0.00000000 -1.17882700  
 C 0.00000000 0.00000000 1.17532000  
 Zero-point correction= 0.019909 (Hartree/Particle)  
 Thermal correction to Energy= 0.023623  
 Thermal correction to Enthalpy= 0.024568  
 Thermal correction to Gibbs Free Energy= -0.002157  
 Sum of electronic and zero-point Energies= -168.621670  
 Sum of electronic and Thermal Energies= -168.617956  
 Sum of electronic and Thermal Enthalpies= -168.617011  
 Sum of electronic and Thermal Free Energies= -168.643736

### O<sub>2</sub>NNCO

B3LYP/6-311++G(3df, 3pd)

O -1.98922400 -0.55137300 0.00048500  
 N 0.22204400 -0.79376400 -0.00045700  
 O -0.78020000 1.25122800 -0.00005100  
 C 1.32842100 -0.24345800 -0.00008600  
 O 2.41447400 0.13221400 0.00032300  
 N -0.95503400 0.05150700 -0.00033400  
 Zero-point correction= 0.024760 (Hartree/Particle)  
 Thermal correction to Energy= 0.029860  
 Thermal correction to Enthalpy= 0.030804  
 Thermal correction to Gibbs Free Energy= -0.004556  
 Sum of electronic and zero-point Energies= -373.255074  
 Sum of electronic and Thermal Energies= -373.249974  
 Sum of electronic and Thermal Enthalpies= -373.249030

Sum of electronic and Thermal Free Energies= -373.284390

### (O=)NNOC(=O)

B3LYP/6-311++G(3df, 3pd)

|                                              |             |                             |             |
|----------------------------------------------|-------------|-----------------------------|-------------|
| O                                            | 0.06257200  | 1.04018200                  | 0.00005200  |
| O                                            | -2.07871900 | 0.03476900                  | -0.00001100 |
| N                                            | -0.05955500 | -1.04676600                 | 0.00006600  |
| C                                            | 0.97168400  | -0.04561600                 | -0.00010600 |
| O                                            | 2.14202500  | -0.04203600                 | 0.00001200  |
| N                                            | -0.91717700 | -0.09460800                 | -0.00003600 |
| Zero-point correction=                       |             | 0.025060 (Hartree/Particle) |             |
| Thermal correction to Energy=                |             | 0.029612                    |             |
| Thermal correction to Enthalpy=              |             | 0.030556                    |             |
| Thermal correction to Gibbs Free Energy=     |             | -0.002838                   |             |
| Sum of electronic and zero-point Energies=   |             | -373.236897                 |             |
| Sum of electronic and Thermal Energies=      |             | -373.232345                 |             |
| Sum of electronic and Thermal Enthalpies=    |             | -373.231401                 |             |
| Sum of electronic and Thermal Free Energies= |             | -373.264795                 |             |

### N<sub>2</sub>O

B3LYP/6-311++G(3df, 3pd)

|                                              |            |                             |             |
|----------------------------------------------|------------|-----------------------------|-------------|
| O                                            | 0.00000000 | 0.00000000                  | 1.10925900  |
| N                                            | 0.00000000 | 0.00000000                  | -0.07321600 |
| N                                            | 0.00000000 | 0.00000000                  | -1.19450900 |
| Zero-point correction=                       |            | 0.011194 (Hartree/Particle) |             |
| Thermal correction to Energy=                |            | 0.013864                    |             |
| Thermal correction to Enthalpy=              |            | 0.014808                    |             |
| Thermal correction to Gibbs Free Energy=     |            | -0.010099                   |             |
| Sum of electronic and zero-point Energies=   |            | -184.722154                 |             |
| Sum of electronic and Thermal Energies=      |            | -184.719484                 |             |
| Sum of electronic and Thermal Enthalpies=    |            | -184.718539                 |             |
| Sum of electronic and Thermal Free Energies= |            | -184.743447                 |             |

### TS5

B3LYP/6-311++G(3df, 3pd)

|                                              |             |                             |            |
|----------------------------------------------|-------------|-----------------------------|------------|
| O                                            | 2.05751700  | -0.09947600                 | 0.00000000 |
| N                                            | -0.02918700 | -1.02308400                 | 0.00000000 |
| O                                            | 0.16571900  | 1.09002600                  | 0.00000000 |
| C                                            | -1.04608400 | -0.14331300                 | 0.00000000 |
| O                                            | -2.18456500 | 0.04084100                  | 0.00000000 |
| N                                            | 0.88163500  | -0.03280900                 | 0.00000000 |
| Zero-point correction=                       |             | 0.024383 (Hartree/Particle) |            |
| Thermal correction to Energy=                |             | 0.028603                    |            |
| Thermal correction to Enthalpy=              |             | 0.029547                    |            |
| Thermal correction to Gibbs Free Energy=     |             | -0.003393                   |            |
| Sum of electronic and zero-point Energies=   |             | -373.232737                 |            |
| Sum of electronic and Thermal Energies=      |             | -373.228517                 |            |
| Sum of electronic and Thermal Enthalpies=    |             | -373.227573                 |            |
| Sum of electronic and Thermal Free Energies= |             | -373.260513                 |            |

### TS6

B3LYP/6-311++G(3df, 3pd)

|   |            |             |            |
|---|------------|-------------|------------|
| O | 0.25963900 | -1.11764900 | 0.00005300 |
|---|------------|-------------|------------|

|                                              |             |                             |             |
|----------------------------------------------|-------------|-----------------------------|-------------|
| O                                            | -2.13198600 | -0.09613800                 | -0.00004300 |
| N                                            | -0.14478200 | 1.03193000                  | -0.00004900 |
| C                                            | 0.98499600  | -0.03155500                 | 0.00002400  |
| O                                            | 2.14033600  | 0.18299000                  | 0.00004100  |
| N                                            | -1.00577400 | 0.17317100                  | -0.00003000 |
| Zero-point correction=                       |             | 0.023591 (Hartree/Particle) |             |
| Thermal correction to Energy=                |             | 0.028066                    |             |
| Thermal correction to Enthalpy=              |             | 0.029010                    |             |
| Thermal correction to Gibbs Free Energy=     |             | -0.004444                   |             |
| Sum of electronic and zero-point Energies=   |             | -373.234722                 |             |
| Sum of electronic and Thermal Energies=      |             | -373.230247                 |             |
| Sum of electronic and Thermal Enthalpies=    |             | -373.229302                 |             |
| Sum of electronic and Thermal Free Energies= |             | -373.262757                 |             |
